# Supplementary material for: Inferring causal direction between two traits in the presence of horizontal pleiotropy with GWAS summary data
Source: PubMed Central journal article supplement (PMC7660933; doi:10.1371/journal.pgen.1009105), 2020-11-02

## S6 Text: More Simulation Results

### Details of Simulation Setups

We used three parameters  $(\beta_{YX}, \mu_\alpha, \sigma_\alpha)$  in each simulation setup.  $\beta_{YX}$  controls the causal effect size,  $\mu_\alpha$  controls the mean direct effect size,  $\sigma_\alpha$  controls the variation of the (random) direct effect sizes. We tried 75 different combinations of  $\beta_{YX} = -0.2, -0.1, 0, 0.1, 0.2, \mu_\alpha = 0, 0.2, 0.4, 0.6, 1, \sigma_\alpha = 0, 0.1, 0.2$ . For each setup we first generated  $\boldsymbol{\beta}_{Xg} = (\beta_{Xg_1}, \beta_{Xg_2}, \dots, \beta_{Xg_{22}})^T$ , the vector of the effect sizes of the 22 SNPs on  $X$ , with each element independently drawn from a truncated standard normal distribution (truncated at 0.5 to ensure  $|\beta_{Xg_j}| \geq 0.5$ ). Then in each simulation, we generated the two traits from the true models:

$$X_i = \mathbf{Z}_i \boldsymbol{\beta}_{Xg} + U_i + \varepsilon_{X_i}, \quad Y_i = \beta_{YX} \cdot X_i + \mathbf{Z}_i \boldsymbol{\alpha} + U_i + \varepsilon_{Y_i},$$

where  $\mathbf{Z}_i$  was the (row) vector of the genotype scores of the 22 SNPs for subject  $i = 1, 2, \dots, n$ ,  $U_i \sim N(0, 1)$  was a confounder; the direct effects of the SNPs on  $Y$ ,  $\boldsymbol{\alpha} = (\alpha_1, \dots, \alpha_{22})^T$ , were generated independently  $\alpha_i \sim N(\mu_\alpha, \sigma_\alpha^2)$ ; and both error terms  $\varepsilon_{X_i}, \varepsilon_{Y_i}$  were independently from  $N(0, 4)$ .

### Estimating $K_{YX}$

Table A shows simulation results for estimating  $K_{YX}$  of CD-Ratio, CD-Egger, and CD-GLS, for the setup  $\mu_\alpha = 0, \sigma_\alpha = 0$ , and various  $\beta_{YX}$  levels. In each row we list the value  $\beta_{YX}$  in the first column, and corresponding true value  $K_{YX}$  in the second column, and for each of three methods we show the estimation results similar to Table 5 in the main text. Table B to Table O show similar results for other setups. When  $\beta_{YX} \neq 0$  the true causal direction is from  $X$  to  $Y$ , we can calculate the true value of  $K_{YX} = \beta_{YX} \cdot \frac{\sqrt{\text{var}(X)}}{\sqrt{\text{var}(Y)}}$ , here

$$\begin{aligned} \text{var}(X) &= \boldsymbol{\beta}_{Xg}^T \boldsymbol{\Sigma} \boldsymbol{\beta}_{Xg} + \text{var}(U) + \text{var}(\varepsilon_X) \\ \text{var}(Y) &= (\mu_\alpha \cdot \mathbf{1} + \beta_{YX} \cdot \boldsymbol{\beta}_{Xg})^T \boldsymbol{\Sigma} (\mu_\alpha \cdot \mathbf{1} + \beta_{YX} \cdot \boldsymbol{\beta}_{Xg}) + (\beta_{YX} + 1)^2 \text{var}(U) + \beta_{YX}^2 \text{var}(\varepsilon_X) + \text{var}(\varepsilon_Y) \end{aligned} \quad (1)$$

$\boldsymbol{\Sigma}$  is the covariance matrix of SNPs. When  $\beta_{YX} = 0$ , we have  $K_{YX} = 0$ .

Table A: Results of  $\mu_\alpha = 0, \sigma_\alpha = 0$ :  $K_{YX}$

| $\beta_{YX}$ | $K_{YX}$ | CD-Ratio          |                 |                       | CD-Egger          |                 |                       | CD-GLS            |                 |                       |
|--------------|----------|-------------------|-----------------|-----------------------|-------------------|-----------------|-----------------------|-------------------|-----------------|-----------------------|
|              |          | Mean( $\hat{K}$ ) | sd( $\hat{K}$ ) | Mean( $se(\hat{K})$ ) | Mean( $\hat{K}$ ) | sd( $\hat{K}$ ) | Mean( $se(\hat{K})$ ) | Mean( $\hat{K}$ ) | sd( $\hat{K}$ ) | Mean( $se(\hat{K})$ ) |
| -0.2         | -0.442   | -0.4415           | 0.0028          | 0.0036                | -0.4415           | 0.0028          | 0.0035                | -0.4415           | 0.0028          | 0.0036                |
| -0.1         | -0.2344  | -0.2341           | 0.0032          | 0.0036                | -0.2341           | 0.0032          | 0.0036                | -0.2341           | 0.0032          | 0.0036                |
| 0            | 0        | 0.0001            | 0.0034          | 0.0035                | 0.0001            | 0.0034          | 0.0036                | 0.0001            | 0.0034          | 0.0036                |
| 0.1          | 0.2257   | 0.2256            | 0.0033          | 0.0036                | 0.2256            | 0.0033          | 0.0036                | 0.2256            | 0.0033          | 0.0036                |
| 0.2          | 0.4139   | 0.4137            | 0.003           | 0.0036                | 0.4137            | 0.003           | 0.0035                | 0.4137            | 0.003           | 0.0036                |

Table B: Results of  $\mu_\alpha = 0.2, \sigma_\alpha = 0$ :  $K_{YX}$

| $\beta_{YX}$ | $K_{YX}$ | CD-Ratio          |                 |                       | CD-Egger          |                 |                       | CD-GLS            |                 |                       |
|--------------|----------|-------------------|-----------------|-----------------------|-------------------|-----------------|-----------------------|-------------------|-----------------|-----------------------|
|              |          | Mean( $\hat{K}$ ) | sd( $\hat{K}$ ) | Mean( $se(\hat{K})$ ) | Mean( $\hat{K}$ ) | sd( $\hat{K}$ ) | Mean( $se(\hat{K})$ ) | Mean( $\hat{K}$ ) | sd( $\hat{K}$ ) | Mean( $se(\hat{K})$ ) |
| -0.2         | -0.3995  | -0.4106           | 0.003           | 0.0038                | -0.3992           | 0.0026          | 0.0034                | -0.3992           | 0.0026          | 0.0035                |
| -0.1         | -0.2093  | -0.2191           | 0.0032          | 0.0039                | -0.2091           | 0.0029          | 0.0035                | -0.2091           | 0.0029          | 0.0035                |
| 0            | 0        | -0.0097           | 0.0034          | 0.0039                | 0                 | 0.0031          | 0.0035                | 0                 | 0.0031          | 0.0035                |
| 0.1          | 0.2027   | 0.1947            | 0.0034          | 0.0039                | 0.2026            | 0.003           | 0.0035                | 0.2026            | 0.003           | 0.0036                |
| 0.2          | 0.3773   | 0.3675            | 0.0031          | 0.0039                | 0.3771            | 0.0028          | 0.0035                | 0.3771            | 0.0028          | 0.0036                |

Table C: Results of  $\mu_\alpha = 0.4, \sigma_\alpha = 0: K_{YX}$ 

| $\beta_{YX}$ | $K_{YX}$ | CD-Ratio          |                 |                       | CD-Egger          |                 |                       | CD-GLS            |                 |                       |
|--------------|----------|-------------------|-----------------|-----------------------|-------------------|-----------------|-----------------------|-------------------|-----------------|-----------------------|
|              |          | Mean( $\hat{K}$ ) | sd( $\hat{K}$ ) | Mean( $se(\hat{K})$ ) | Mean( $\hat{K}$ ) | sd( $\hat{K}$ ) | Mean( $se(\hat{K})$ ) | Mean( $\hat{K}$ ) | sd( $\hat{K}$ ) | Mean( $se(\hat{K})$ ) |
| -0.2         | -0.3203  | -0.3298           | 0.0031          | 0.004                 | -0.3202           | 0.0022          | 0.0032                | -0.3202           | 0.0022          | 0.0033                |
| -0.1         | -0.1649  | -0.1777           | 0.0032          | 0.0041                | -0.1648           | 0.0023          | 0.0033                | -0.1648           | 0.0023          | 0.0033                |
| 0            | 0        | -0.0158           | 0.0033          | 0.0041                | 0                 | 0.0025          | 0.0033                | 0                 | 0.0025          | 0.0034                |
| 0.1          | 0.1614   | 0.1464            | 0.0033          | 0.0041                | 0.1613            | 0.0025          | 0.0034                | 0.1613            | 0.0025          | 0.0034                |
| 0.2          | 0.3079   | 0.2956            | 0.0032          | 0.0041                | 0.3078            | 0.0024          | 0.0034                | 0.3078            | 0.0024          | 0.0035                |

Table D: Results of  $\mu_\alpha = 0.6, \sigma_\alpha = 0: K_{YX}$ 

| $\beta_{YX}$ | $K_{YX}$ | CD-Ratio          |                 |                       | CD-Egger          |                 |                       | CD-GLS            |                 |                       |
|--------------|----------|-------------------|-----------------|-----------------------|-------------------|-----------------|-----------------------|-------------------|-----------------|-----------------------|
|              |          | Mean( $\hat{K}$ ) | sd( $\hat{K}$ ) | Mean( $se(\hat{K})$ ) | Mean( $\hat{K}$ ) | sd( $\hat{K}$ ) | Mean( $se(\hat{K})$ ) | Mean( $\hat{K}$ ) | sd( $\hat{K}$ ) | Mean( $se(\hat{K})$ ) |
| -0.2         | -0.2535  | -0.2713           | 0.0033          | 0.0041                | -0.2535           | 0.0018          | 0.0031                | -0.2535           | 0.0018          | 0.0032                |
| -0.1         | -0.129   | -0.1538           | 0.0034          | 0.0042                | -0.129            | 0.0019          | 0.0031                | -0.129            | 0.0019          | 0.0032                |
| 0            | 0        | -0.0304           | 0.0034          | 0.0042                | 0                 | 0.002           | 0.0032                | 0                 | 0.002           | 0.0032                |
| 0.1          | 0.1272   | 0.0955            | 0.0034          | 0.0042                | 0.1272            | 0.002           | 0.0033                | 0.1272            | 0.002           | 0.0033                |
| 0.2          | 0.2469   | 0.2181            | 0.0033          | 0.0042                | 0.2468            | 0.002           | 0.0034                | 0.2468            | 0.002           | 0.0034                |

Table E: Results of  $\mu_\alpha = 1, \sigma_\alpha = 0: K_{YX}$ 

| $\beta_{YX}$ | $K_{YX}$ | CD-Ratio          |                 |                       | CD-Egger          |                 |                       | CD-GLS            |                 |                       |
|--------------|----------|-------------------|-----------------|-----------------------|-------------------|-----------------|-----------------------|-------------------|-----------------|-----------------------|
|              |          | Mean( $\hat{K}$ ) | sd( $\hat{K}$ ) | Mean( $se(\hat{K})$ ) | Mean( $\hat{K}$ ) | sd( $\hat{K}$ ) | Mean( $se(\hat{K})$ ) | Mean( $\hat{K}$ ) | sd( $\hat{K}$ ) | Mean( $se(\hat{K})$ ) |
| -0.2         | -0.171   | -0.2063           | 0.0036          | 0.0042                | -0.171            | 0.0013          | 0.003                 | -0.171            | 0.0012          | 0.003                 |
| -0.1         | -0.0862  | -0.1297           | 0.0036          | 0.0043                | -0.0862           | 0.0013          | 0.003                 | -0.0862           | 0.0013          | 0.003                 |
| 0            | 0        | -0.0503           | 0.0036          | 0.0043                | 0                 | 0.0013          | 0.0031                | 0                 | 0.0013          | 0.0031                |
| 0.1          | 0.0856   | 0.0315            | 0.0035          | 0.0043                | 0.0855            | 0.0014          | 0.0032                | 0.0856            | 0.0014          | 0.0032                |
| 0.2          | 0.1687   | 0.1144            | 0.0035          | 0.0043                | 0.1687            | 0.0014          | 0.0033                | 0.1687            | 0.0014          | 0.0033                |

Table F: Results of  $\mu_\alpha = 0, \sigma_\alpha = 0.1: K_{YX}$ 

| $\beta_{YX}$ | $K_{YX}$ | CD-Ratio          |                 |                       | CD-Egger          |                 |                       | CD-GLS            |                 |                       |
|--------------|----------|-------------------|-----------------|-----------------------|-------------------|-----------------|-----------------------|-------------------|-----------------|-----------------------|
|              |          | Mean( $\hat{K}$ ) | sd( $\hat{K}$ ) | Mean( $se(\hat{K})$ ) | Mean( $\hat{K}$ ) | sd( $\hat{K}$ ) | Mean( $se(\hat{K})$ ) | Mean( $\hat{K}$ ) | sd( $\hat{K}$ ) | Mean( $se(\hat{K})$ ) |
| -0.2         | -0.442   | -0.4254           | 0.0477          | 0.0037                | -0.4335           | 0.0345          | 0.0386                | -0.4335           | 0.0347          | 0.0394                |
| -0.1         | -0.2344  | -0.2233           | 0.0545          | 0.0037                | -0.2296           | 0.0409          | 0.0408                | -0.2295           | 0.0414          | 0.0416                |
| 0            | 0        | 0.0013            | 0.0563          | 0.0037                | -0.0007           | 0.0431          | 0.041                 | -0.0005           | 0.0436          | 0.0419                |
| 0.1          | 0.2257   | 0.2181            | 0.0531          | 0.0037                | 0.2201            | 0.0397          | 0.0393                | 0.2203            | 0.0402          | 0.0401                |
| 0.2          | 0.4139   | 0.4019            | 0.0459          | 0.0037                | 0.4056            | 0.0332          | 0.0362                | 0.4059            | 0.0334          | 0.0369                |

Table G: Results of  $\mu_\alpha = 0.2, \sigma_\alpha = 0.1: K_{YX}$ 

| $\beta_{YX}$ | $K_{YX}$ | CD-Ratio          |                 |                       | CD-Egger          |                 |                       | CD-GLS            |                 |                       |
|--------------|----------|-------------------|-----------------|-----------------------|-------------------|-----------------|-----------------------|-------------------|-----------------|-----------------------|
|              |          | Mean( $\hat{K}$ ) | sd( $\hat{K}$ ) | Mean( $se(\hat{K})$ ) | Mean( $\hat{K}$ ) | sd( $\hat{K}$ ) | Mean( $se(\hat{K})$ ) | Mean( $\hat{K}$ ) | sd( $\hat{K}$ ) | Mean( $se(\hat{K})$ ) |
| -0.2         | -0.3995  | -0.4048           | 0.0463          | 0.0038                | -0.3936           | 0.0328          | 0.035                 | -0.3936           | 0.0326          | 0.0357                |
| -0.1         | -0.2093  | -0.2172           | 0.0517          | 0.0039                | -0.2061           | 0.037           | 0.0366                | -0.206            | 0.0373          | 0.0373                |
| 0            | 0        | -0.0112           | 0.0538          | 0.0039                | -0.0005           | 0.0386          | 0.0368                | -0.0004           | 0.0392          | 0.0375                |
| 0.1          | 0.2027   | 0.1898            | 0.0514          | 0.0039                | 0.1987            | 0.0369          | 0.0355                | 0.1989            | 0.0375          | 0.0362                |
| 0.2          | 0.3773   | 0.3612            | 0.0452          | 0.0039                | 0.3711            | 0.0326          | 0.0331                | 0.3714            | 0.0331          | 0.0338                |

Table H: Results of  $\mu_\alpha = 0.4, \sigma_\alpha = 0.1: K_{YX}$ 

| $\beta_{YX}$ | $K_{YX}$ | CD-Ratio          |                 |                       | CD-Egger          |                 |                       | CD-GLS            |                 |                       |
|--------------|----------|-------------------|-----------------|-----------------------|-------------------|-----------------|-----------------------|-------------------|-----------------|-----------------------|
|              |          | Mean( $\hat{K}$ ) | sd( $\hat{K}$ ) | Mean( $se(\hat{K})$ ) | Mean( $\hat{K}$ ) | sd( $\hat{K}$ ) | Mean( $se(\hat{K})$ ) | Mean( $\hat{K}$ ) | sd( $\hat{K}$ ) | Mean( $se(\hat{K})$ ) |
| -0.2         | -0.3203  | -0.3301           | 0.0412          | 0.004                 | -0.3176           | 0.028           | 0.0282                | -0.3176           | 0.028           | 0.0288                |
| -0.1         | -0.1649  | -0.1796           | 0.0435          | 0.0041                | -0.1636           | 0.0298          | 0.029                 | -0.1635           | 0.03            | 0.0296                |
| 0            | 0        | -0.0183           | 0.0448          | 0.0041                | -0.0004           | 0.0306          | 0.0291                | -0.0003           | 0.0311          | 0.0297                |
| 0.1          | 0.1614   | 0.1438            | 0.0448          | 0.0041                | 0.1593            | 0.0301          | 0.0285                | 0.1595            | 0.0307          | 0.029                 |
| 0.2          | 0.3079   | 0.2925            | 0.0424          | 0.0041                | 0.3046            | 0.0284          | 0.0272                | 0.3049            | 0.029           | 0.0278                |

Table I: Results of  $\mu_\alpha = 0.6, \sigma_\alpha = 0.1: K_{YX}$ 

| $\beta_{YX}$ | $K_{YX}$ | CD-Ratio          |                 |                       | CD-Egger          |                 |                       | CD-GLS            |                 |                       |
|--------------|----------|-------------------|-----------------|-----------------------|-------------------|-----------------|-----------------------|-------------------|-----------------|-----------------------|
|              |          | Mean( $\hat{K}$ ) | sd( $\hat{K}$ ) | Mean( $se(\hat{K})$ ) | Mean( $\hat{K}$ ) | sd( $\hat{K}$ ) | Mean( $se(\hat{K})$ ) | Mean( $\hat{K}$ ) | sd( $\hat{K}$ ) | Mean( $se(\hat{K})$ ) |
| -0.2         | -0.2535  | -0.2721           | 0.0341          | 0.0041                | -0.2524           | 0.0228          | 0.0224                | -0.2524           | 0.0228          | 0.0229                |
| -0.1         | -0.129   | -0.1552           | 0.0351          | 0.0042                | -0.1285           | 0.0236          | 0.0228                | -0.1285           | 0.0238          | 0.0233                |
| 0            | 0        | -0.0317           | 0.0357          | 0.0042                | -0.0003           | 0.024           | 0.0228                | -0.0002           | 0.0244          | 0.0233                |
| 0.1          | 0.1272   | 0.0944            | 0.0362          | 0.0042                | 0.1261            | 0.024           | 0.0225                | 0.1263            | 0.0244          | 0.023                 |
| 0.2          | 0.2469   | 0.217             | 0.0359          | 0.0042                | 0.2451            | 0.0234          | 0.0219                | 0.2454            | 0.0239          | 0.0224                |

Table J: Results of  $\mu_\alpha = 1, \sigma_\alpha = 0.1: K_{YX}$ 

| $\beta_{YX}$ | $K_{YX}$ | CD-Ratio          |                 |                       | CD-Egger          |                 |                       | CD-GLS            |                 |                       |
|--------------|----------|-------------------|-----------------|-----------------------|-------------------|-----------------|-----------------------|-------------------|-----------------|-----------------------|
|              |          | Mean( $\hat{K}$ ) | sd( $\hat{K}$ ) | Mean( $se(\hat{K})$ ) | Mean( $\hat{K}$ ) | sd( $\hat{K}$ ) | Mean( $se(\hat{K})$ ) | Mean( $\hat{K}$ ) | sd( $\hat{K}$ ) | Mean( $se(\hat{K})$ ) |
| -0.2         | -0.171   | -0.2066           | 0.0236          | 0.0042                | -0.1708           | 0.0157          | 0.0151                | -0.1708           | 0.0158          | 0.0154                |
| -0.1         | -0.0862  | -0.1301           | 0.0238          | 0.0043                | -0.0862           | 0.0159          | 0.0153                | -0.0862           | 0.0161          | 0.0156                |
| 0            | 0        | -0.0506           | 0.0241          | 0.0043                | -0.0002           | 0.0161          | 0.0153                | -0.0002           | 0.0164          | 0.0156                |
| 0.1          | 0.0856   | 0.0313            | 0.0244          | 0.0043                | 0.0851            | 0.0162          | 0.0152                | 0.0852            | 0.0165          | 0.0155                |
| 0.2          | 0.1687   | 0.1143            | 0.0247          | 0.0043                | 0.1681            | 0.0161          | 0.015                 | 0.1682            | 0.0165          | 0.0153                |

Table K: Results of  $\mu_\alpha = 0, \sigma_\alpha = 0.2: K_{YX}$ 

| $\beta_{YX}$ | $K_{YX}$ | CD-Ratio          |                 |                       | CD-Egger          |                 |                       | CD-GLS            |                 |                       |
|--------------|----------|-------------------|-----------------|-----------------------|-------------------|-----------------|-----------------------|-------------------|-----------------|-----------------------|
|              |          | Mean( $\hat{K}$ ) | sd( $\hat{K}$ ) | Mean( $se(\hat{K})$ ) | Mean( $\hat{K}$ ) | sd( $\hat{K}$ ) | Mean( $se(\hat{K})$ ) | Mean( $\hat{K}$ ) | sd( $\hat{K}$ ) | Mean( $se(\hat{K})$ ) |
| -0.2         | -0.442   | -0.3933           | 0.0936          | 0.0038                | -0.4113           | 0.0669          | 0.0727                | -0.4111           | 0.0674          | 0.0742                |
| -0.1         | -0.2344  | -0.2037           | 0.1043          | 0.0039                | -0.2168           | 0.0771          | 0.0763                | -0.2166           | 0.0781          | 0.078                 |
| 0            | 0        | 0.0031            | 0.107           | 0.0038                | -0.0017           | 0.0804          | 0.0768                | -0.0015           | 0.0815          | 0.0784                |
| 0.1          | 0.2257   | 0.2031            | 0.1021          | 0.0038                | 0.2066            | 0.0751          | 0.0738                | 0.2068            | 0.076           | 0.0754                |
| 0.2          | 0.4139   | 0.3767            | 0.0909          | 0.0038                | 0.385             | 0.0644          | 0.0685                | 0.3853            | 0.0648          | 0.07                  |

Table L: Results of  $\mu_\alpha = 0.2, \sigma_\alpha = 0.2: K_{YX}$ 

| $\beta_{YX}$ | $K_{YX}$ | CD-Ratio          |                 |                       | CD-Egger          |                 |                       | CD-GLS            |                 |                       |
|--------------|----------|-------------------|-----------------|-----------------------|-------------------|-----------------|-----------------------|-------------------|-----------------|-----------------------|
|              |          | Mean( $\hat{K}$ ) | sd( $\hat{K}$ ) | Mean( $se(\hat{K})$ ) | Mean( $\hat{K}$ ) | sd( $\hat{K}$ ) | Mean( $se(\hat{K})$ ) | Mean( $\hat{K}$ ) | sd( $\hat{K}$ ) | Mean( $se(\hat{K})$ ) |
| -0.2         | -0.3995  | -0.3871           | 0.089           | 0.0039                | -0.3775           | 0.0632          | 0.0668                | -0.3773           | 0.0633          | 0.0682                |
| -0.1         | -0.2093  | -0.2079           | 0.099           | 0.0039                | -0.1971           | 0.0705          | 0.0695                | -0.1968           | 0.0712          | 0.071                 |
| 0            | 0        | -0.0129           | 0.1023          | 0.0039                | -0.0012           | 0.0733          | 0.0698                | -0.0009           | 0.0744          | 0.0712                |
| 0.1          | 0.2027   | 0.1764            | 0.0977          | 0.0039                | 0.1889            | 0.0703          | 0.0675                | 0.1893            | 0.0715          | 0.0689                |
| 0.2          | 0.3773   | 0.3409            | 0.0874          | 0.0039                | 0.3555            | 0.0629          | 0.0633                | 0.3559            | 0.0639          | 0.0646                |

Table M: Results of  $\mu_\alpha = 0.4, \sigma_\alpha = 0.2: K_{YX}$

| $\beta_{YX}$ | $K_{YX}$ | CD-Ratio          |                 |                       | CD-Egger          |                 |                       | CD-GLS            |                 |                       |
|--------------|----------|-------------------|-----------------|-----------------------|-------------------|-----------------|-----------------------|-------------------|-----------------|-----------------------|
|              |          | Mean( $\hat{K}$ ) | sd( $\hat{K}$ ) | Mean( $se(\hat{K})$ ) | Mean( $\hat{K}$ ) | sd( $\hat{K}$ ) | Mean( $se(\hat{K})$ ) | Mean( $\hat{K}$ ) | sd( $\hat{K}$ ) | Mean( $se(\hat{K})$ ) |
| -0.2         | -0.3203  | -0.3305           | 0.0782          | 0.004                 | -0.3097           | 0.0546          | 0.0548                | -0.3096           | 0.0546          | 0.0559                |
| -0.1         | -0.1649  | -0.1836           | 0.0837          | 0.004                 | -0.1594           | 0.0578          | 0.0562                | -0.1592           | 0.0584          | 0.0574                |
| 0            | 0        | -0.0248           | 0.0871          | 0.004                 | -0.0009           | 0.0593          | 0.0563                | -0.0006           | 0.0603          | 0.0575                |
| 0.1          | 0.1614   | 0.1345            | 0.0868          | 0.0041                | 0.1544            | 0.0584          | 0.0551                | 0.1547            | 0.0596          | 0.0562                |
| 0.2          | 0.3079   | 0.2805            | 0.082           | 0.0041                | 0.2962            | 0.0552          | 0.0527                | 0.2965            | 0.0564          | 0.0538                |

Table N: Results of  $\mu_\alpha = 0.6, \sigma_\alpha = 0.2: K_{YX}$

| $\beta_{YX}$ | $K_{YX}$ | CD-Ratio          |                 |                       | CD-Egger          |                 |                       | CD-GLS            |                 |                       |
|--------------|----------|-------------------|-----------------|-----------------------|-------------------|-----------------|-----------------------|-------------------|-----------------|-----------------------|
|              |          | Mean( $\hat{K}$ ) | sd( $\hat{K}$ ) | Mean( $se(\hat{K})$ ) | Mean( $\hat{K}$ ) | sd( $\hat{K}$ ) | Mean( $se(\hat{K})$ ) | Mean( $\hat{K}$ ) | sd( $\hat{K}$ ) | Mean( $se(\hat{K})$ ) |
| -0.2         | -0.2535  | -0.2754           | 0.0659          | 0.0041                | -0.2487           | 0.0448          | 0.044                 | -0.2486           | 0.0449          | 0.0449                |
| -0.1         | -0.129   | -0.1595           | 0.0685          | 0.0041                | -0.1268           | 0.0463          | 0.0447                | -0.1266           | 0.0468          | 0.0456                |
| 0            | 0        | -0.0361           | 0.0706          | 0.0042                | -0.0007           | 0.0471          | 0.0447                | -0.0005           | 0.0479          | 0.0457                |
| 0.1          | 0.1272   | 0.0901            | 0.0716          | 0.0042                | 0.1236            | 0.047           | 0.0441                | 0.1239            | 0.048           | 0.045                 |
| 0.2          | 0.2469   | 0.2122            | 0.0706          | 0.0042                | 0.2408            | 0.0459          | 0.0428                | 0.2411            | 0.0469          | 0.0437                |

Table O: Results of  $\mu_\alpha = 1, \sigma_\alpha = 0.2: K_{YX}$

| $\beta_{YX}$ | $K_{YX}$ | CD-Ratio          |                 |                       | CD-Egger          |                 |                       | CD-GLS            |                 |                       |
|--------------|----------|-------------------|-----------------|-----------------------|-------------------|-----------------|-----------------------|-------------------|-----------------|-----------------------|
|              |          | Mean( $\hat{K}$ ) | sd( $\hat{K}$ ) | Mean( $se(\hat{K})$ ) | Mean( $\hat{K}$ ) | sd( $\hat{K}$ ) | Mean( $se(\hat{K})$ ) | Mean( $\hat{K}$ ) | sd( $\hat{K}$ ) | Mean( $se(\hat{K})$ ) |
| -0.2         | -0.171   | -0.2087           | 0.0464          | 0.0042                | -0.1699           | 0.031           | 0.03                  | -0.1699           | 0.0312          | 0.0306                |
| -0.1         | -0.0862  | -0.1321           | 0.0471          | 0.0042                | -0.0859           | 0.0315          | 0.0302                | -0.0858           | 0.0319          | 0.0309                |
| 0            | 0        | -0.0523           | 0.0479          | 0.0043                | -0.0005           | 0.0318          | 0.0302                | -0.0004           | 0.0324          | 0.0309                |
| 0.1          | 0.0856   | 0.0301            | 0.0486          | 0.0043                | 0.0842            | 0.032           | 0.03                  | 0.0843            | 0.0326          | 0.0307                |
| 0.2          | 0.1687   | 0.1134            | 0.0492          | 0.0043                | 0.1665            | 0.0319          | 0.0296                | 0.1667            | 0.0326          | 0.0303                |

### Goodness-of-Fit Tests

We show the results of the Goodness-of-Fit tests for CD-Ratio, CD-Egger, and CD-GLS. Table P shows the results under setup  $\mu_\alpha = 0, \sigma_\alpha = 0$ , and various levels of  $\beta_{YX}$ . For each of the three methods, in each of 500 simulations we can calculate the test statistics  $Q^{YX}$  and  $Q^{XY}$ , then perform the corresponding  $\chi^2$ -test to get  $p$ -value  $p_{YX}$  for direction  $X$  to  $Y$ , and  $p$ -value  $p_{XY}$  for direction  $Y$  to  $X$ , respectively. Then we show the proportion out of 500 simulated datasets  $p_{YX}$ 's less than 0.05, indicated by " $p_{YX} < 0.05$ ", and proportion of  $p_{XY}$ 's less than 0.05, indicated by " $p_{XY} < 0.05$ ". Table Q to A4 shows the results for other setups.

Table P: GOF Testing Results of  $\mu_\alpha = 0, \sigma_\alpha = 0$

| $\beta_{YX}$ | CD-Ratio        |                 | CD-Egger        |                 | CD-GLS          |                 |
|--------------|-----------------|-----------------|-----------------|-----------------|-----------------|-----------------|
|              | $p_{YX} < 0.05$ | $p_{XY} < 0.05$ | $p_{YX} < 0.05$ | $p_{XY} < 0.05$ | $p_{YX} < 0.05$ | $p_{XY} < 0.05$ |
| -0.2         | 0.002           | 0.012           | 0               | 0.014           | 0               | 0               |
| -0.1         | 0.012           | 0.188           | 0               | 0               | 0               | 0               |
| 0            | 0.054           | 0.042           | 0.002           | 0               | 0.002           | 0.026           |
| 0.1          | 0.022           | 0.18            | 0.002           | 0               | 0               | 0               |
| 0.2          | 0               | 0.022           | 0               | 0.006           | 0               | 0               |

Table Q: GOF Results of  $\mu_\alpha = 0.2, \sigma_\alpha = 0$

| $\beta_{YX}$ | CD-Ratio        |                 | CD-Egger        |                 | CD-GLS          |                 |
|--------------|-----------------|-----------------|-----------------|-----------------|-----------------|-----------------|
|              | $p_{YX} < 0.05$ | $p_{XY} < 0.05$ | $p_{YX} < 0.05$ | $p_{XY} < 0.05$ | $p_{YX} < 0.05$ | $p_{XY} < 0.05$ |
| -0.2         | 1               | 1               | 0               | 0.014           | 0               | 0               |
| -0.1         | 1               | 1               | 0               | 0               | 0               | 0               |
| 0            | 1               | 1               | 0               | 0               | 0               | 0               |
| 0.1          | 1               | 1               | 0               | 0               | 0               | 0               |
| 0.2          | 1               | 1               | 0               | 0.006           | 0               | 0               |

Table R: GOF Results of  $\mu_\alpha = 0.4, \sigma_\alpha = 0$

| $\beta_{YX}$ | CD-Ratio        |                 | CD-Egger        |                 | CD-GLS          |                 |
|--------------|-----------------|-----------------|-----------------|-----------------|-----------------|-----------------|
|              | $p_{YX} < 0.05$ | $p_{XY} < 0.05$ | $p_{YX} < 0.05$ | $p_{XY} < 0.05$ | $p_{YX} < 0.05$ | $p_{XY} < 0.05$ |
| -0.2         | 1               | 1               | 0               | 0.014           | 0               | 0               |
| -0.1         | 1               | 1               | 0               | 0               | 0               | 0               |
| 0            | 1               | 1               | 0               | 0               | 0               | 0               |
| 0.1          | 1               | 1               | 0               | 0               | 0               | 0               |
| 0.2          | 1               | 1               | 0               | 0.006           | 0               | 0               |

Table S: GOF Results of  $\mu_\alpha = 0.6, \sigma_\alpha = 0$

| $\beta_{YX}$ | CD-Ratio        |                 | CD-Egger        |                 | CD-GLS          |                 |
|--------------|-----------------|-----------------|-----------------|-----------------|-----------------|-----------------|
|              | $p_{YX} < 0.05$ | $p_{XY} < 0.05$ | $p_{YX} < 0.05$ | $p_{XY} < 0.05$ | $p_{YX} < 0.05$ | $p_{XY} < 0.05$ |
| -0.2         | 1               | 1               | 0               | 0.014           | 0               | 0               |
| -0.1         | 1               | 1               | 0               | 0               | 0               | 0               |
| 0            | 1               | 1               | 0               | 0               | 0               | 0               |
| 0.1          | 1               | 1               | 0               | 0               | 0               | 0               |
| 0.2          | 1               | 1               | 0               | 0.006           | 0               | 0               |

Table T: GOF Results of  $\mu_\alpha = 1, \sigma_\alpha = 0$

| $\beta_{YX}$ | CD-Ratio        |                 | CD-Egger        |                 | CD-GLS          |                 |
|--------------|-----------------|-----------------|-----------------|-----------------|-----------------|-----------------|
|              | $p_{YX} < 0.05$ | $p_{XY} < 0.05$ | $p_{YX} < 0.05$ | $p_{XY} < 0.05$ | $p_{YX} < 0.05$ | $p_{XY} < 0.05$ |
| -0.2         | 1               | 1               | 0               | 0.014           | 0               | 0               |
| -0.1         | 1               | 1               | 0               | 0               | 0               | 0               |
| 0            | 1               | 1               | 0               | 0               | 0               | 0               |
| 0.1          | 1               | 1               | 0               | 0               | 0               | 0               |
| 0.2          | 1               | 1               | 0               | 0.006           | 0               | 0               |

Table U: GOF Results of  $\mu_\alpha = 0, \sigma_\alpha = 0.1$ 

| $\beta_{YX}$ | CD-Ratio        |                 | CD-Egger        |                 | CD-GLS          |                 |
|--------------|-----------------|-----------------|-----------------|-----------------|-----------------|-----------------|
|              | $p_{YX} < 0.05$ | $p_{XY} < 0.05$ | $p_{YX} < 0.05$ | $p_{XY} < 0.05$ | $p_{YX} < 0.05$ | $p_{XY} < 0.05$ |
| -0.2         | 1               | 1               | 0               | 0               | 0               | 0               |
| -0.1         | 1               | 1               | 0               | 0               | 0               | 0               |
| 0            | 1               | 1               | 0               | 0               | 0               | 0               |
| 0.1          | 1               | 1               | 0               | 0               | 0               | 0               |
| 0.2          | 1               | 1               | 0               | 0               | 0               | 0               |

Table V: GOF Results of  $\mu_\alpha = 0.2, \sigma_\alpha = 0.1$ 

| $\beta_{YX}$ | CD-Ratio        |                 | CD-Egger        |                 | CD-GLS          |                 |
|--------------|-----------------|-----------------|-----------------|-----------------|-----------------|-----------------|
|              | $p_{YX} < 0.05$ | $p_{XY} < 0.05$ | $p_{YX} < 0.05$ | $p_{XY} < 0.05$ | $p_{YX} < 0.05$ | $p_{XY} < 0.05$ |
| -0.2         | 1               | 1               | 0               | 0               | 0               | 0               |
| -0.1         | 1               | 1               | 0               | 0               | 0               | 0               |
| 0            | 1               | 1               | 0               | 0               | 0               | 0               |
| 0.1          | 1               | 1               | 0               | 0               | 0               | 0               |
| 0.2          | 1               | 1               | 0               | 0               | 0               | 0               |

Table W: GOF Results of  $\mu_\alpha = 0.4, \sigma_\alpha = 0.1$ 

| $\beta_{YX}$ | CD-Ratio        |                 | CD-Egger        |                 | CD-GLS          |                 |
|--------------|-----------------|-----------------|-----------------|-----------------|-----------------|-----------------|
|              | $p_{YX} < 0.05$ | $p_{XY} < 0.05$ | $p_{YX} < 0.05$ | $p_{XY} < 0.05$ | $p_{YX} < 0.05$ | $p_{XY} < 0.05$ |
| -0.2         | 1               | 1               | 0               | 0               | 0               | 0               |
| -0.1         | 1               | 1               | 0               | 0               | 0               | 0               |
| 0            | 1               | 1               | 0               | 0               | 0               | 0               |
| 0.1          | 1               | 1               | 0               | 0               | 0               | 0               |
| 0.2          | 1               | 1               | 0               | 0               | 0               | 0               |

Table X: GOF Results of  $\mu_\alpha = 0.6, \sigma_\alpha = 0.1$ 

| $\beta_{YX}$ | CD-Ratio        |                 | CD-Egger        |                 | CD-GLS          |                 |
|--------------|-----------------|-----------------|-----------------|-----------------|-----------------|-----------------|
|              | $p_{YX} < 0.05$ | $p_{XY} < 0.05$ | $p_{YX} < 0.05$ | $p_{XY} < 0.05$ | $p_{YX} < 0.05$ | $p_{XY} < 0.05$ |
| -0.2         | 1               | 1               | 0               | 0               | 0               | 0               |
| -0.1         | 1               | 1               | 0               | 0               | 0               | 0               |
| 0            | 1               | 1               | 0               | 0               | 0               | 0               |
| 0.1          | 1               | 1               | 0               | 0               | 0               | 0               |
| 0.2          | 1               | 1               | 0               | 0               | 0               | 0               |

Table Y: GOF Results of  $\mu_\alpha = 1, \sigma_\alpha = 0.1$

| $\beta_{YX}$ | CD-Ratio        |                 | CD-Egger        |                 | CD-GLS          |                 |
|--------------|-----------------|-----------------|-----------------|-----------------|-----------------|-----------------|
|              | $p_{YX} < 0.05$ | $p_{XY} < 0.05$ | $p_{YX} < 0.05$ | $p_{XY} < 0.05$ | $p_{YX} < 0.05$ | $p_{XY} < 0.05$ |
| -0.2         | 1               | 1               | 0               | 0               | 0               | 0               |
| -0.1         | 1               | 1               | 0               | 0               | 0               | 0               |
| 0            | 1               | 1               | 0               | 0               | 0               | 0               |
| 0.1          | 1               | 1               | 0               | 0               | 0               | 0               |
| 0.2          | 1               | 1               | 0               | 0               | 0               | 0               |

Table Z: GOF Results of  $\mu_\alpha = 0, \sigma_\alpha = 0.2$

| $\beta_{YX}$ | CD-Ratio        |                 | CD-Egger        |                 | CD-GLS          |                 |
|--------------|-----------------|-----------------|-----------------|-----------------|-----------------|-----------------|
|              | $p_{YX} < 0.05$ | $p_{XY} < 0.05$ | $p_{YX} < 0.05$ | $p_{XY} < 0.05$ | $p_{YX} < 0.05$ | $p_{XY} < 0.05$ |
| -0.2         | 1               | 1               | 0               | 0               | 0               | 0               |
| -0.1         | 1               | 1               | 0               | 0               | 0               | 0               |
| 0            | 1               | 1               | 0               | 0               | 0               | 0               |
| 0.1          | 1               | 1               | 0               | 0               | 0               | 0               |
| 0.2          | 1               | 1               | 0               | 0               | 0               | 0               |

Table A1: GOF Results of  $\mu_\alpha = 0.2, \sigma_\alpha = 0.2$

| $\beta_{YX}$ | CD-Ratio        |                 | CD-Egger        |                 | CD-GLS          |                 |
|--------------|-----------------|-----------------|-----------------|-----------------|-----------------|-----------------|
|              | $p_{YX} < 0.05$ | $p_{XY} < 0.05$ | $p_{YX} < 0.05$ | $p_{XY} < 0.05$ | $p_{YX} < 0.05$ | $p_{XY} < 0.05$ |
| -0.2         | 1               | 1               | 0               | 0               | 0               | 0               |
| -0.1         | 1               | 1               | 0               | 0               | 0               | 0               |
| 0            | 1               | 1               | 0               | 0               | 0               | 0               |
| 0.1          | 1               | 1               | 0               | 0               | 0               | 0               |
| 0.2          | 1               | 1               | 0               | 0               | 0               | 0               |

Table A2: GOF Results of  $\mu_\alpha = 0.4, \sigma_\alpha = 0.2$

| $\beta_{YX}$ | CD-Ratio        |                 | CD-Egger        |                 | CD-GLS          |                 |
|--------------|-----------------|-----------------|-----------------|-----------------|-----------------|-----------------|
|              | $p_{YX} < 0.05$ | $p_{XY} < 0.05$ | $p_{YX} < 0.05$ | $p_{XY} < 0.05$ | $p_{YX} < 0.05$ | $p_{XY} < 0.05$ |
| -0.2         | 1               | 1               | 0               | 0               | 0               | 0               |
| -0.1         | 1               | 1               | 0               | 0               | 0               | 0               |
| 0            | 1               | 1               | 0               | 0               | 0               | 0               |
| 0.1          | 1               | 1               | 0               | 0               | 0               | 0               |
| 0.2          | 1               | 1               | 0               | 0               | 0               | 0               |

Table A3: GOF Results of  $\mu_\alpha = 0.6, \sigma_\alpha = 0.2$

| $\beta_{YX}$ | CD-Ratio        |                 | CD-Egger        |                 | CD-GLS          |                 |
|--------------|-----------------|-----------------|-----------------|-----------------|-----------------|-----------------|
|              | $p_{YX} < 0.05$ | $p_{XY} < 0.05$ | $p_{YX} < 0.05$ | $p_{XY} < 0.05$ | $p_{YX} < 0.05$ | $p_{XY} < 0.05$ |
| -0.2         | 1               | 1               | 0               | 0               | 0               | 0               |
| -0.1         | 1               | 1               | 0               | 0               | 0               | 0               |
| 0            | 1               | 1               | 0               | 0               | 0               | 0               |
| 0.1          | 1               | 1               | 0               | 0               | 0               | 0               |
| 0.2          | 1               | 1               | 0               | 0               | 0               | 0               |

Table A4: GOF Results of  $\mu_\alpha = 1, \sigma_\alpha = 0.2$

| $\beta_{YX}$ | CD-Ratio        |                 | CD-Egger        |                 | CD-GLS          |                 |
|--------------|-----------------|-----------------|-----------------|-----------------|-----------------|-----------------|
|              | $p_{YX} < 0.05$ | $p_{XY} < 0.05$ | $p_{YX} < 0.05$ | $p_{XY} < 0.05$ | $p_{YX} < 0.05$ | $p_{XY} < 0.05$ |
| -0.2         | 1               | 1               | 0               | 0               | 0               | 0               |
| -0.1         | 1               | 1               | 0               | 0               | 0               | 0               |
| 0            | 1               | 1               | 0               | 0               | 0               | 0               |
| 0.1          | 1               | 1               | 0               | 0               | 0               | 0               |
| 0.2          | 1               | 1               | 0               | 0               | 0               | 0               |

### Comparing the Decisions

We compare CD-Ratio, CD-Egger and CD-GLS with MR Steiger’s and bi-directional MR in terms of their decisions made on the causal direction. Similar to Steiger’s method, we also applied CD-Ratio to each of the 22 SNPs, then calculated the proportions of the three possible decisions, denoted by “CD-Ratio-Prop”. We also pooled together the individual results from each of the 22 SNPs by majority voting to reach a final decision, denoted as “CD-Ratio-MV”. For other methods, their notations are the same as in Fig. 9 in the main text. Figure A shows the comparison results for setup  $\beta_{YX} = 0, \mu_\alpha = 0$ , and  $\sigma_\alpha = 0, 0.1, 0.2$ . Figure B to Y show the comparison results for other simulation setups.

Figure A: Relative frequencies of decisions for causal direction of all methods:  $\beta_{YX} = 0, \mu_\alpha = 0$

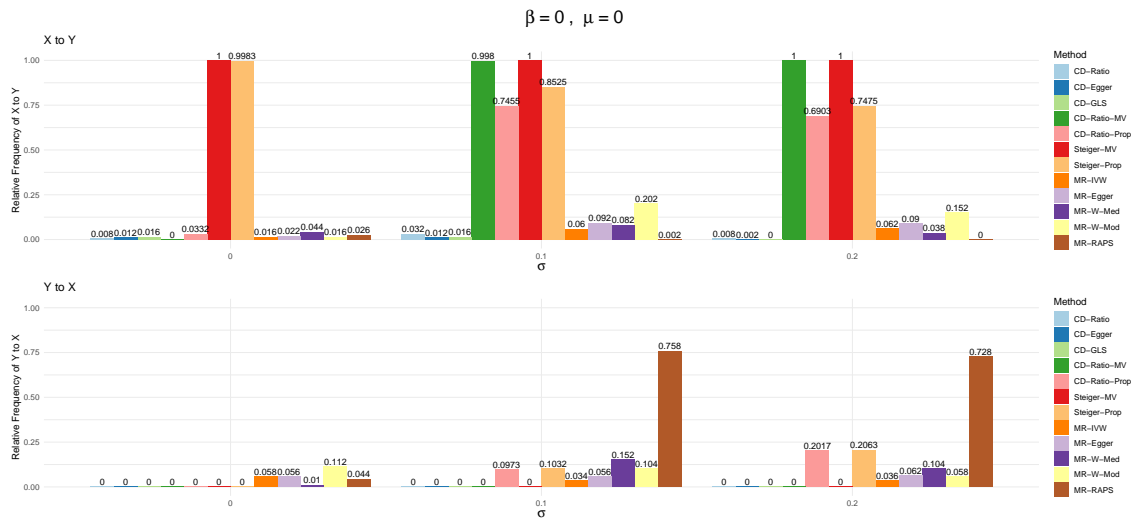



Figure B: Relative frequencies of decisions for causal direction of all methods:  $\beta_{YX} = 0, \mu_{\alpha} = 0.2$

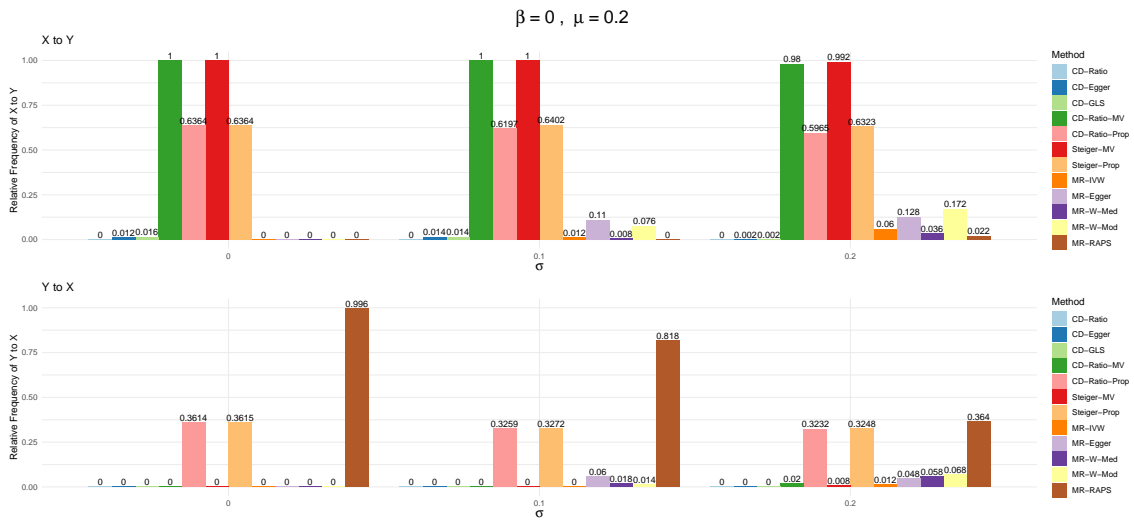

Figure C: Relative frequencies of decisions for causal direction of all methods:  $\beta_{YX} = 0, \mu_{\alpha} = 0.4$

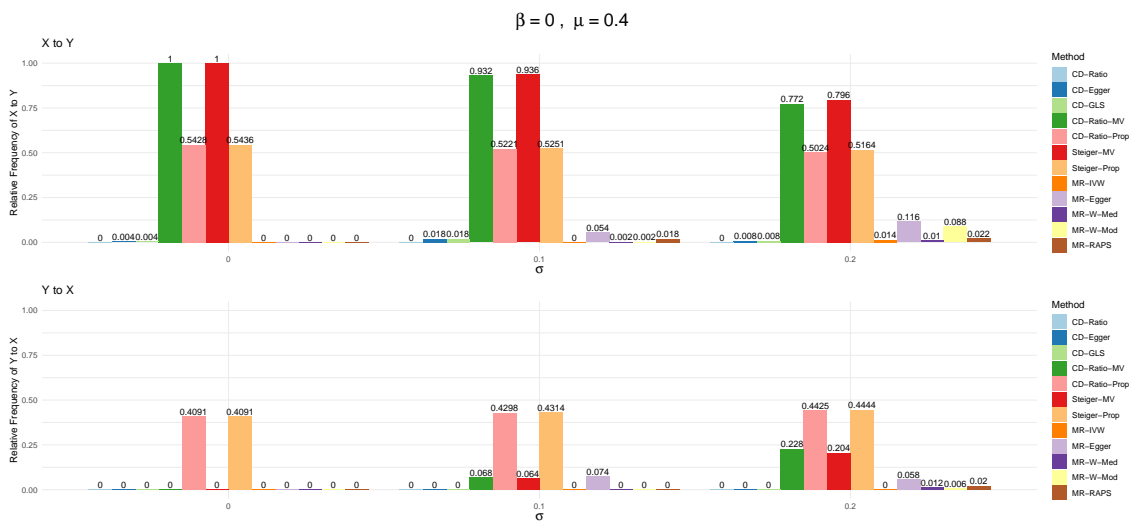

Figure D: Relative frequencies of decisions for causal direction of all methods:  $\beta_{YX} = 0, \mu_{\alpha} = 0.6$

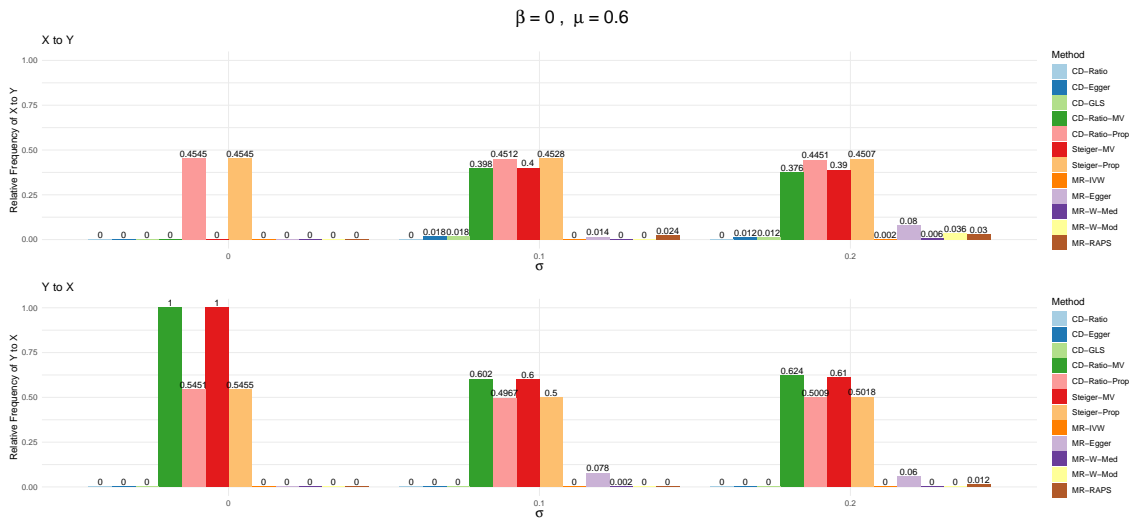

Figure E: Relative frequencies of decisions for causal direction of all methods:  $\beta_{YX} = 0, \mu_{\alpha} = 1$

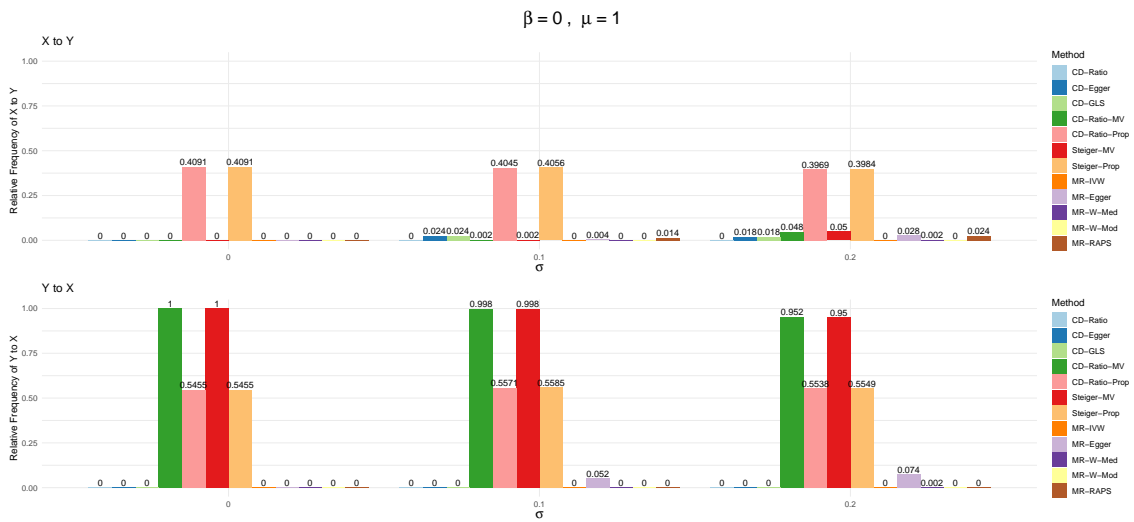

Figure F: Relative frequencies of decisions for causal direction of all methods:  $\beta_{YX} = 0.1, \mu_{\alpha} = 0$

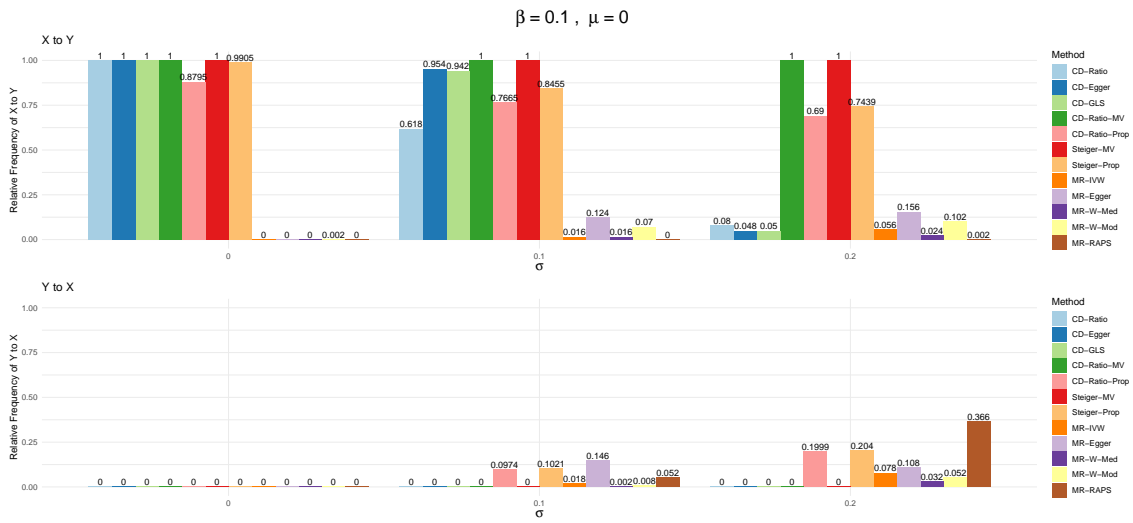

Figure G: Relative frequencies of decisions for causal direction of all methods:  $\beta_{YX} = 0.1, \mu_{\alpha} = 0.2$

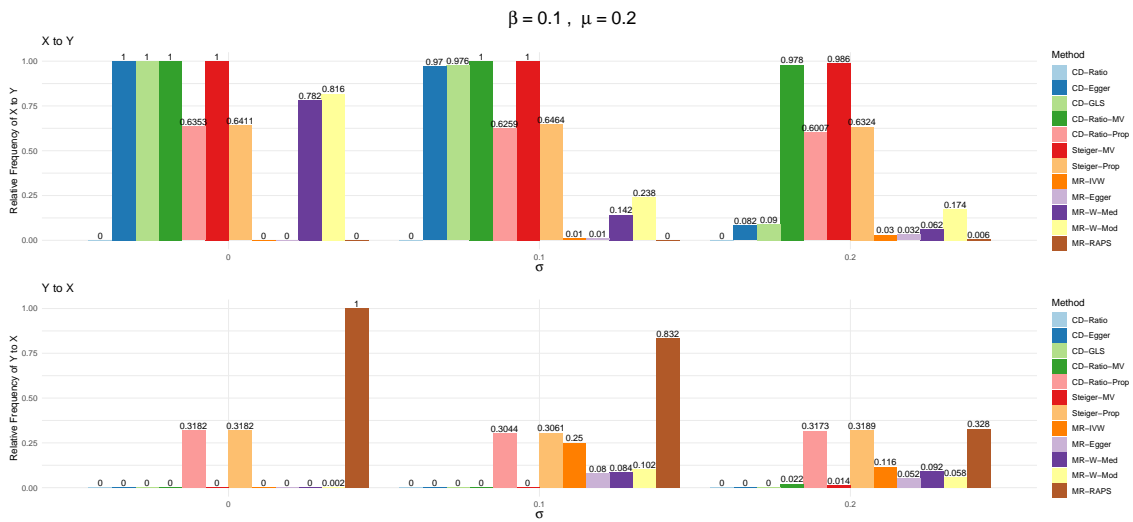

Figure H: Relative frequencies of decisions for causal direction of all methods:  $\beta_{YX} = 0.1, \mu_{\alpha} = 0.4$

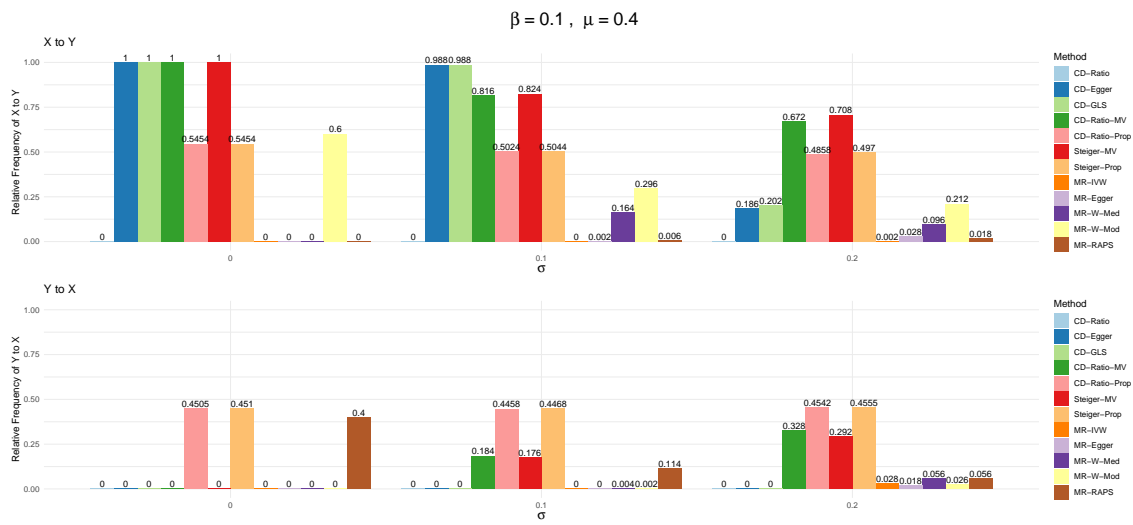

Figure I: Relative frequencies of decisions for causal direction of all methods:  $\beta_{YX} = 0.1, \mu_{\alpha} = 0.6$

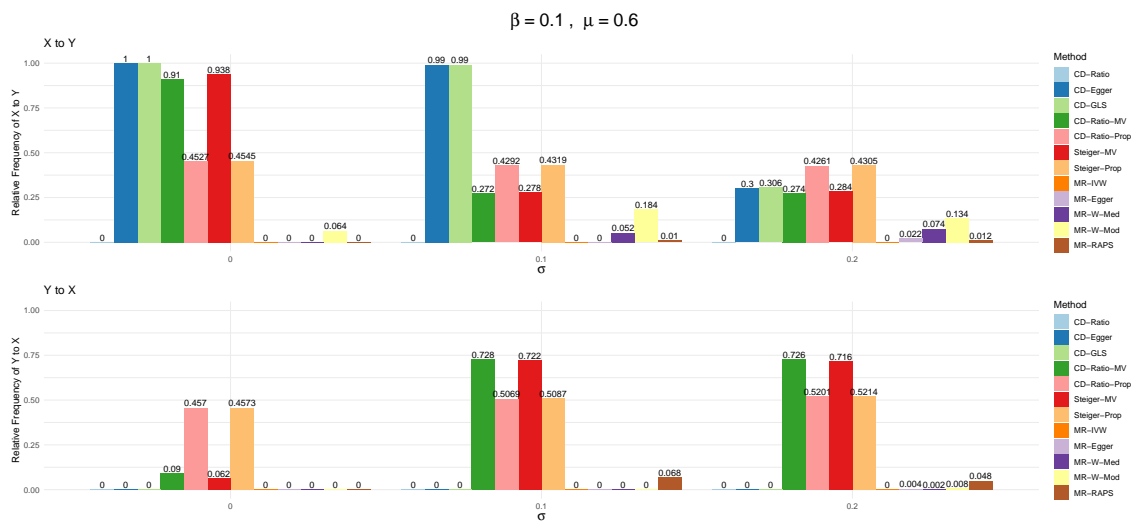

Figure J: Relative frequencies of decisions for causal direction of all methods:  $\beta_{YX} = 0.1, \mu_{\alpha} = 1$

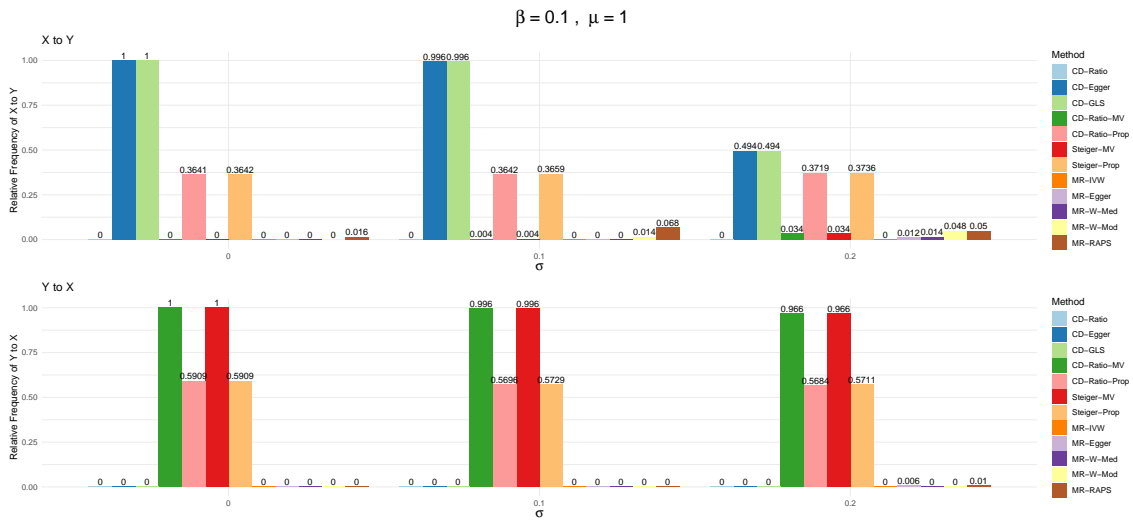

Figure K: Relative frequencies of decisions for causal direction of all methods:  $\beta_{YX} = -0.1, \mu_{\alpha} = 0$

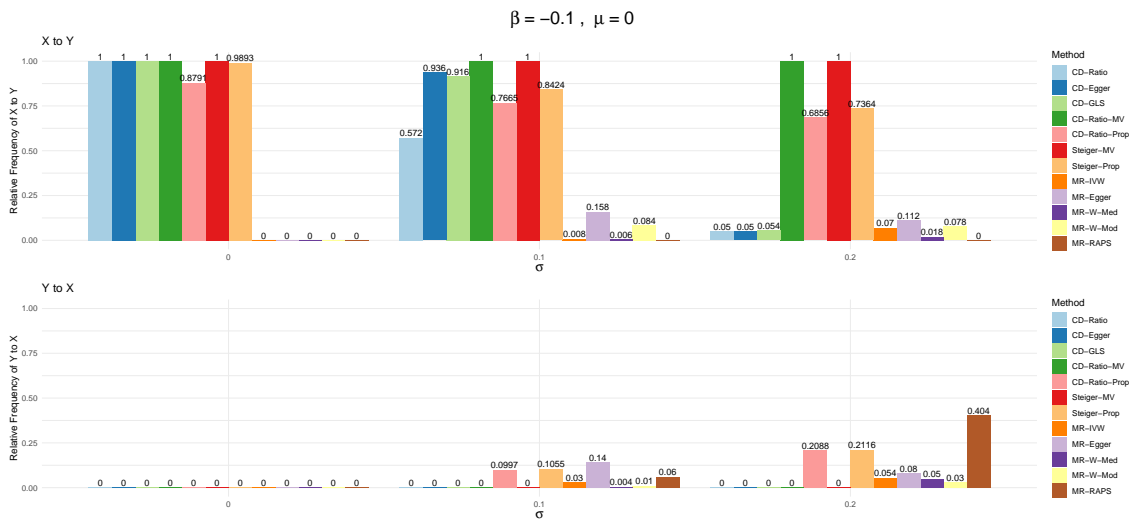

Figure L: Relative frequencies of decisions for causal direction of all methods:  $\beta_{YX} = -0.1, \mu_\alpha = 0.2$

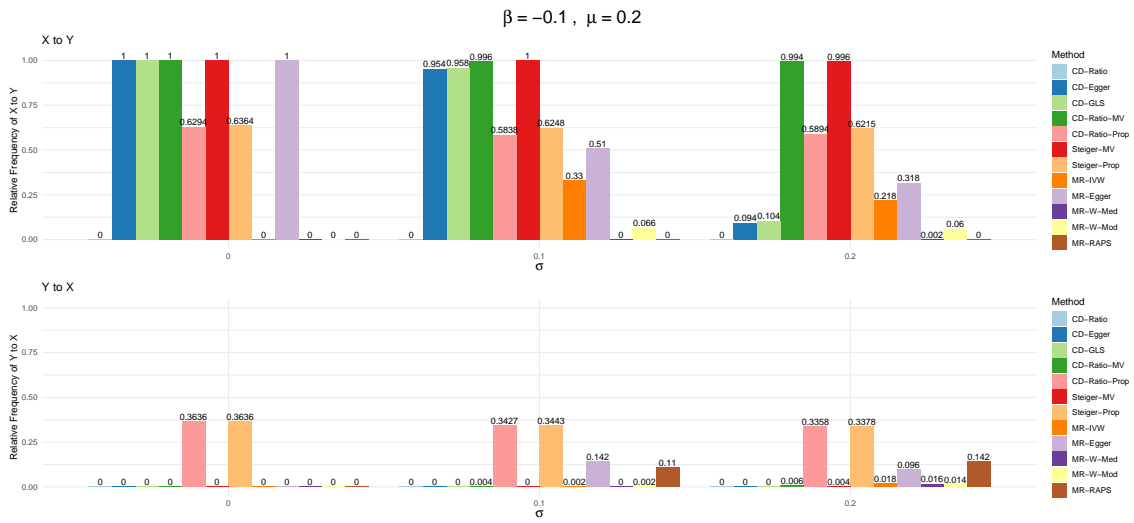

Figure M: Relative frequencies of decisions for causal direction of all methods:  $\beta_{YX} = -0.1, \mu_\alpha = 0.4$

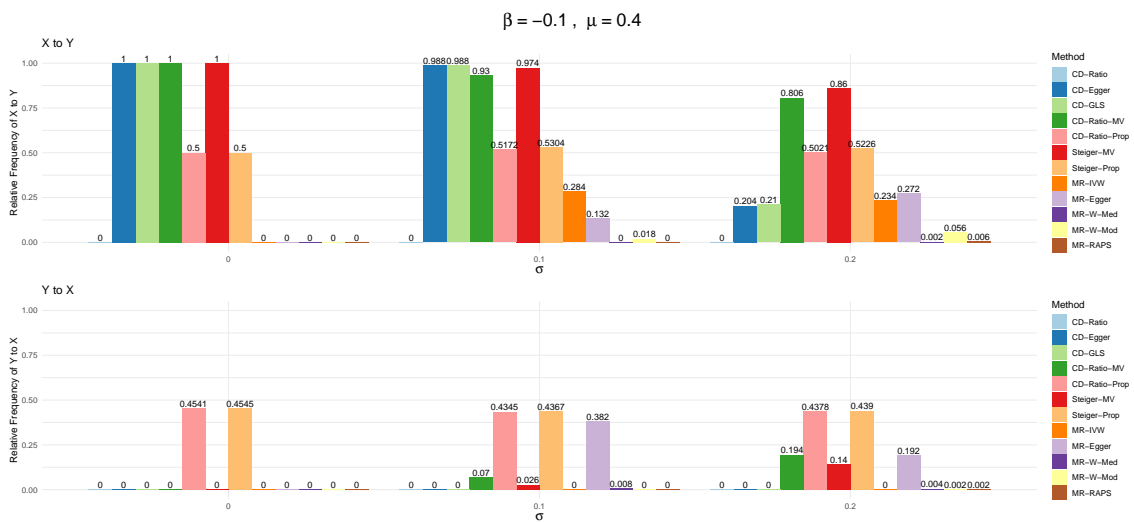

Figure N: Relative frequencies of decisions for causal direction of all methods:  $\beta_{YX} = -0.1, \mu_{\alpha} = 0.6$

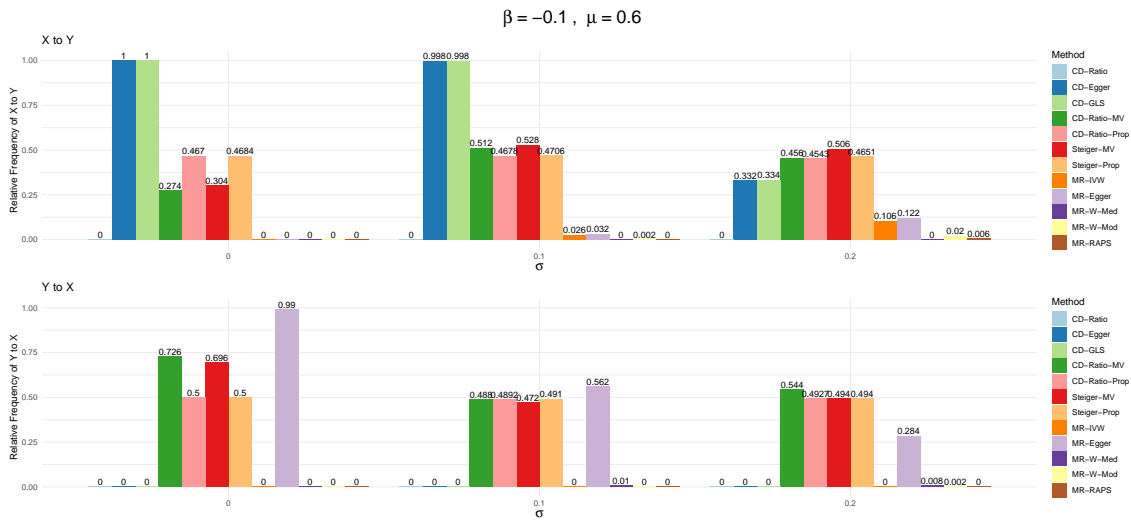

Figure O: Relative frequencies of decisions for causal direction of all methods:  $\beta_{YX} = -0.1, \mu_{\alpha} = 1$

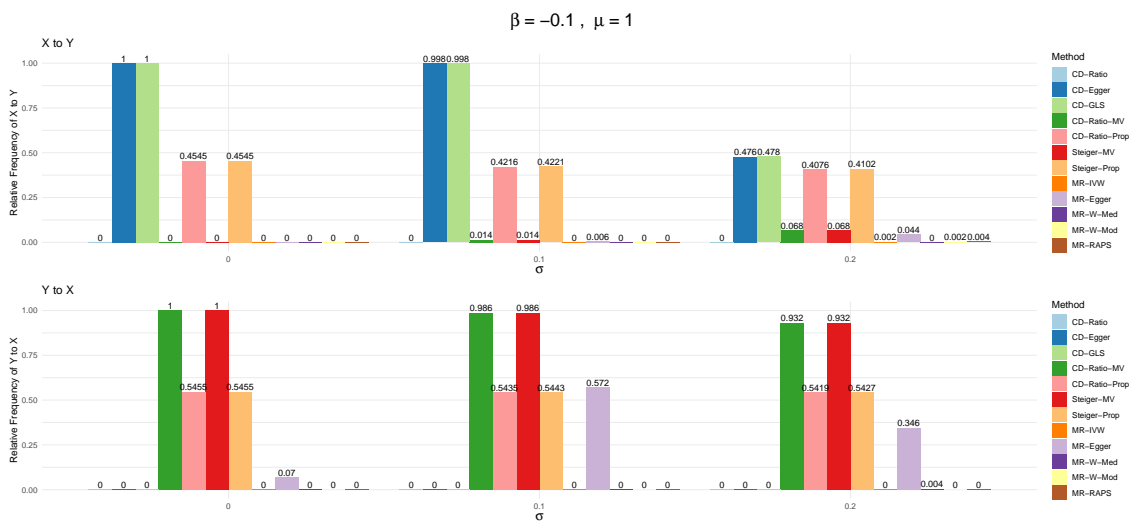

Figure P: Relative frequencies of decisions for causal direction of all methods:  $\beta_{YX} = 0.2, \mu_{\alpha} = 0$

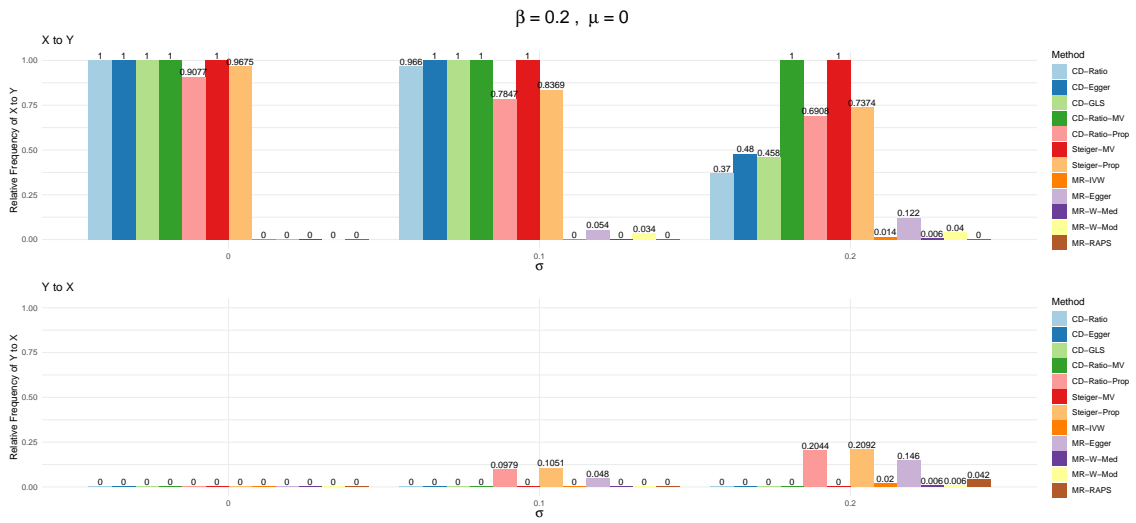

Figure Q: Relative frequencies of decisions for causal direction of all methods:  $\beta_{YX} = 0.2, \mu_{\alpha} = 0.2$

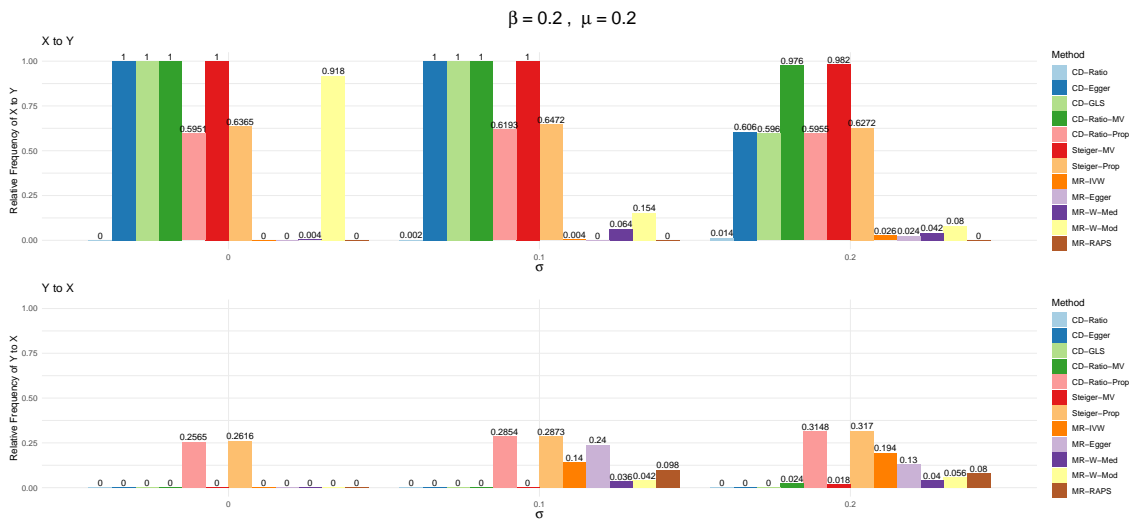



Figure R: Relative frequencies of decisions for causal direction of all methods:  $\beta_{YX} = 0.2, \mu_{\alpha} = 0.4$

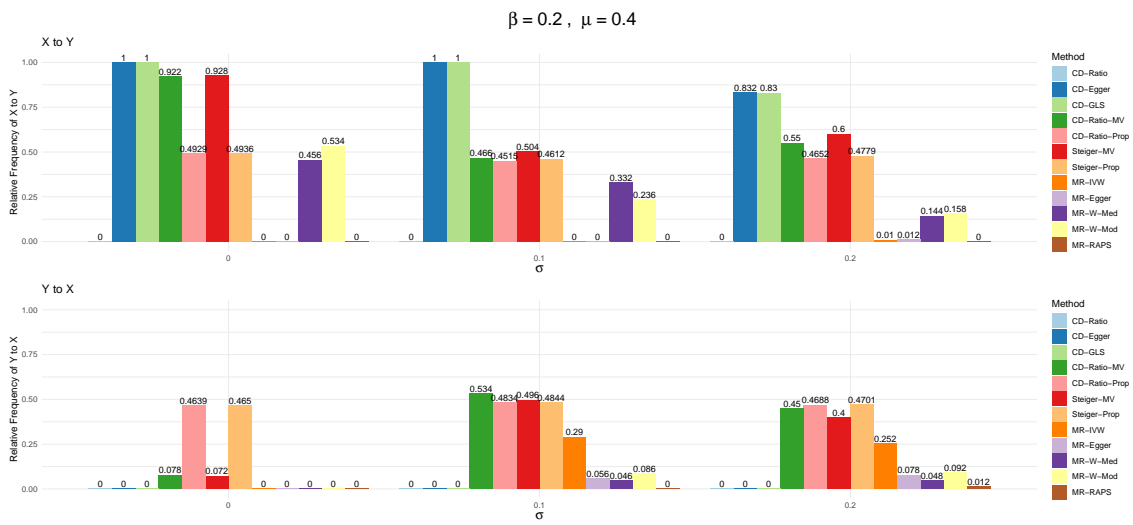

Figure S: Relative frequencies of decisions for causal direction of all methods:  $\beta_{YX} = 0.2, \mu_{\alpha} = 0.6$

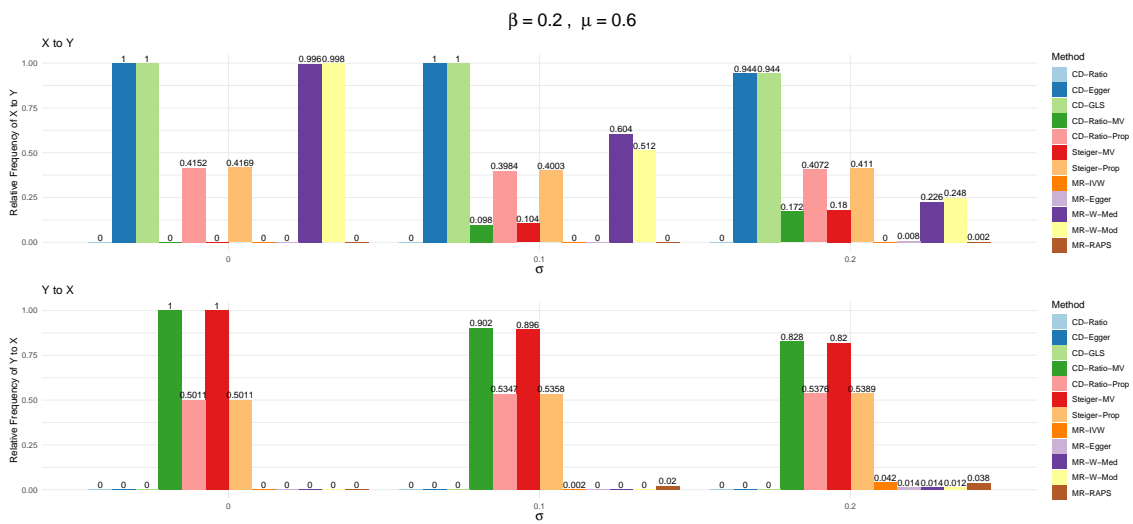

Figure T: Relative frequencies of decisions for causal direction of all methods:  $\beta_{YX} = 0.2, \mu_{\alpha} = 1$

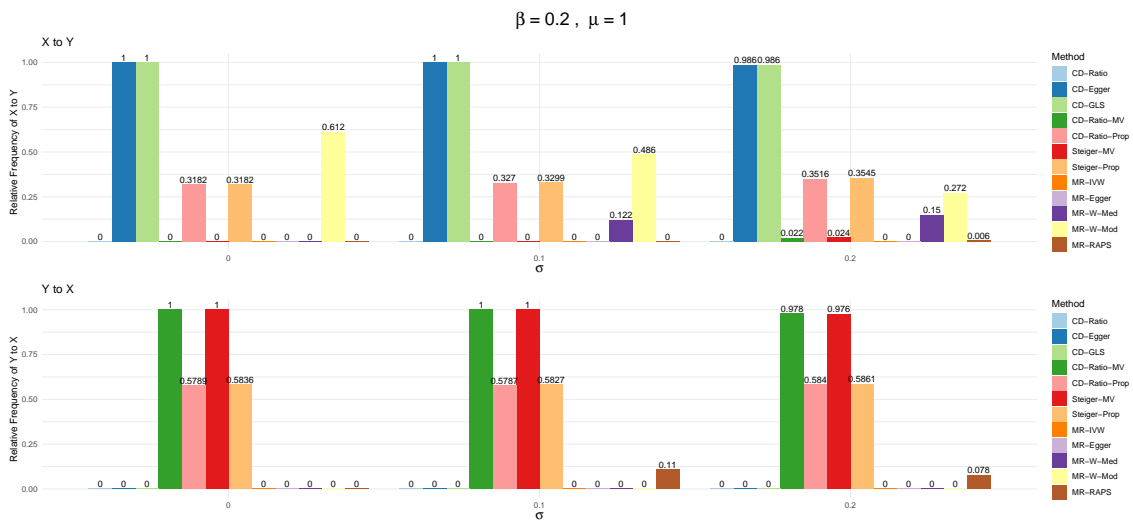

Figure U: Relative frequencies of decisions for causal direction of all methods:  $\beta_{YX} = -0.2, \mu_{\alpha} = 0$

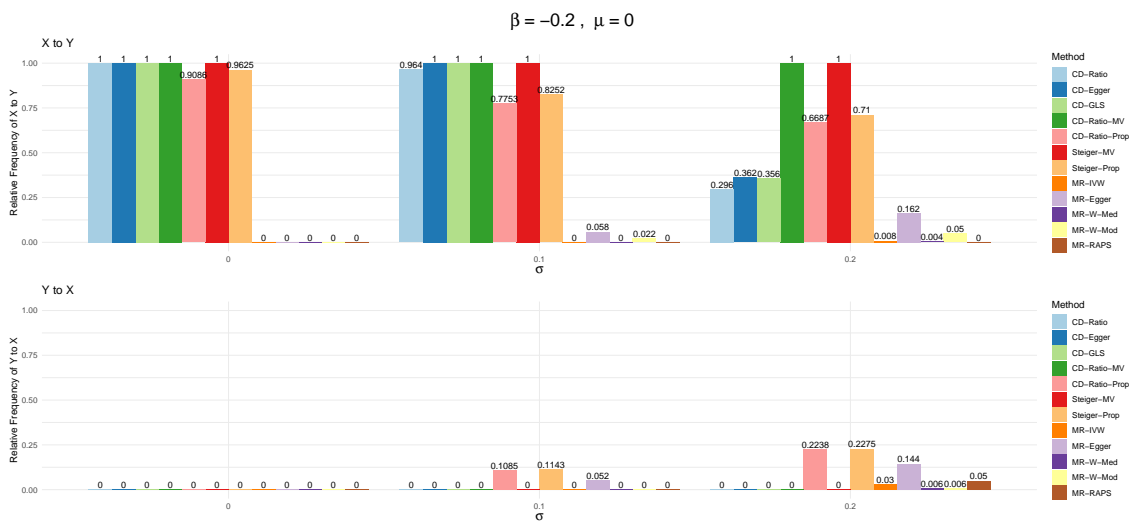

Figure V: Relative frequencies of decisions for causal direction of all methods:  $\beta_{YX} = -0.2, \mu_{\alpha} = 0.2$

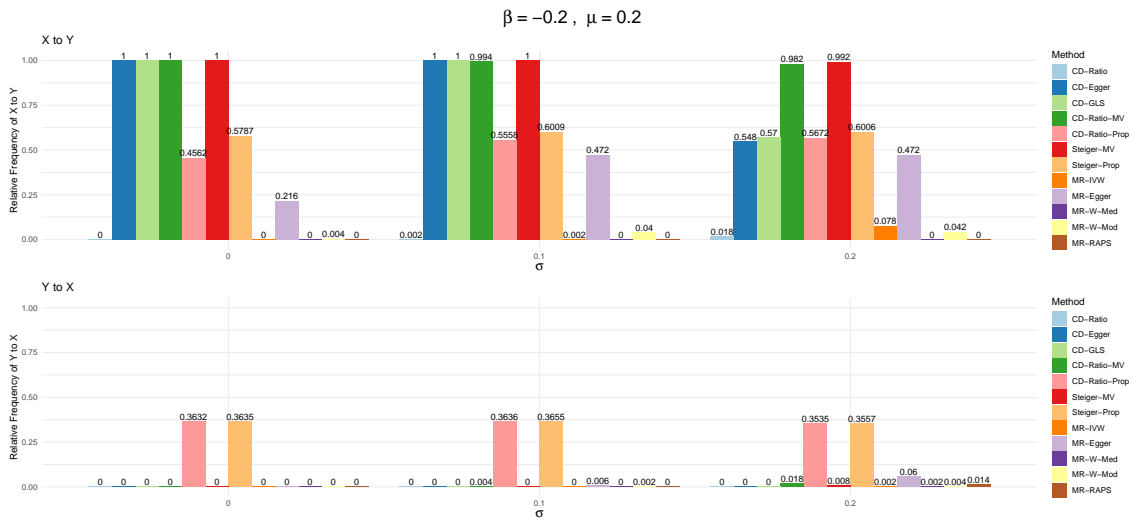

Figure W: Relative frequencies of decisions for causal direction of all methods:  $\beta_{YX} = -0.2, \mu_{\alpha} = 0.4$

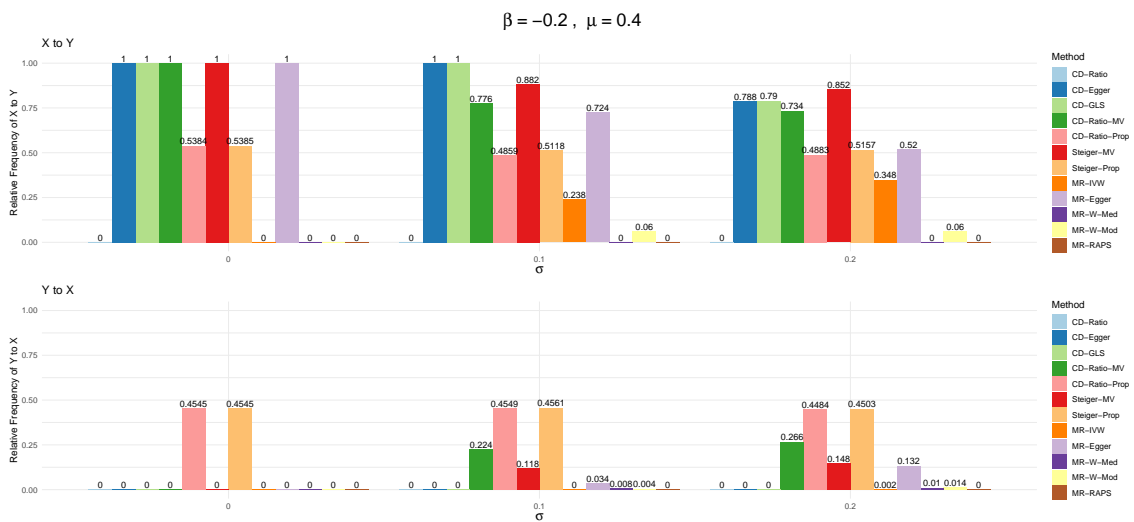

Figure X: Relative frequencies of decisions for causal direction of all methods:  $\beta_{YX} = -0.2, \mu_{\alpha} = 0.6$

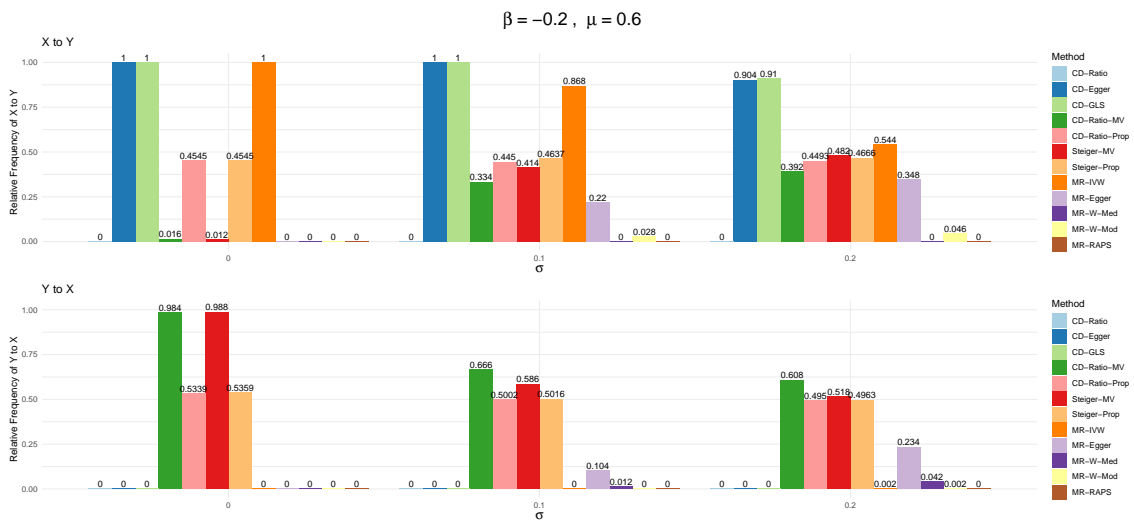

Figure Y: Relative frequencies of decisions for causal direction of all methods:  $\beta_{YX} = -0.2, \mu_{\alpha} = 1$

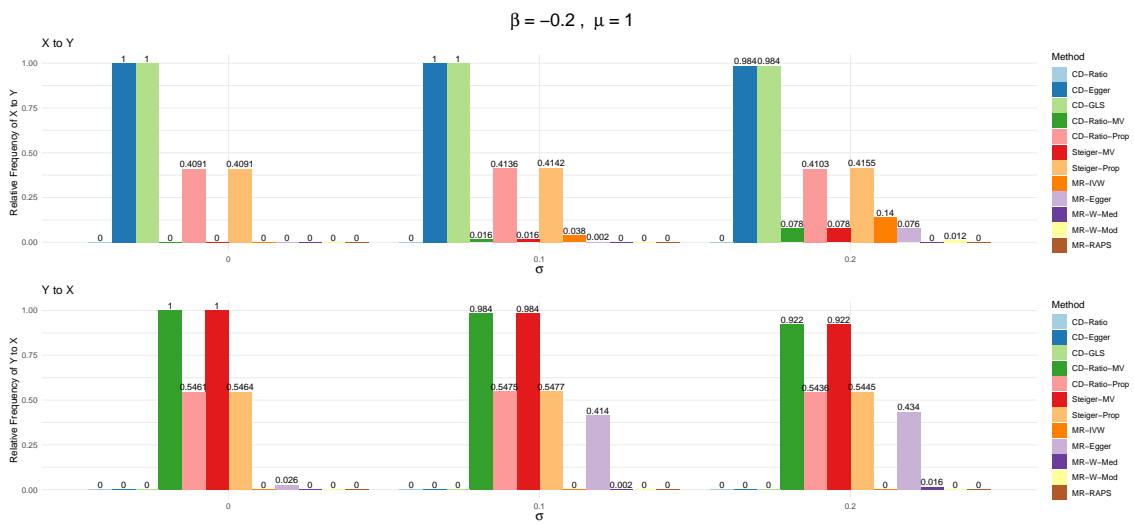

Supplement: pgen.1009105.s006.pdf [file pgen.1009105.s006.pdf]
