# Supplementary material for: Inferring causal direction between two traits in the presence of horizontal pleiotropy with GWAS summary data
Source: PubMed Central journal article supplement (PMC7660933; doi:10.1371/journal.pgen.1009105), 2020-11-02

## S9 Text: Simulations to Study Selection Bias

Table A: Simulation results for estimating  $K_{YX}$  with no pleiotropy. The means, standard deviations (sd) and SEs (se) from each method are shown for each set-up based on 500 simulated datasets.  $\mu_\alpha$  represents the mean of the pleiotropic/direct effects (with standard deviation  $\sigma_\alpha = 0$ ).  $N$  represents the number of top SNPs that are used.

| No pleiotropy |          |     |                   |                 |                       |                   |                 |                       |                   |                 |                       |
|---------------|----------|-----|-------------------|-----------------|-----------------------|-------------------|-----------------|-----------------------|-------------------|-----------------|-----------------------|
| $\mu_\alpha$  | $K_{YX}$ | $N$ | CD-Ratio          |                 |                       | CD-Egger          |                 |                       | CD-GLS            |                 |                       |
|               |          |     | Mean( $\hat{K}$ ) | sd( $\hat{K}$ ) | Mean( $se(\hat{K})$ ) | Mean( $\hat{K}$ ) | sd( $\hat{K}$ ) | Mean( $se(\hat{K})$ ) | Mean( $\hat{K}$ ) | sd( $\hat{K}$ ) | Mean( $se(\hat{K})$ ) |
| 0             | 0        | 10  | -0.0001           | 0.0069          | 0.0052                | 0                 | 0.007           | 0.0063                | 0                 | 0.007           | 0.0063                |
|               |          | 15  | 0.0001            | 0.0048          | 0.0042                | 0.0001            | 0.0048          | 0.0047                | 0.0001            | 0.0048          | 0.0047                |
|               |          | 22  | 0.0001            | 0.0034          | 0.0035                | 0.0001            | 0.0034          | 0.0036                | 0.0001            | 0.0034          | 0.0036                |
| 0             | 0.2257   | 10  | 0.2261            | 0.0038          | 0.0041                | 0.226             | 0.0039          | 0.0042                | 0.226             | 0.0039          | 0.0043                |
|               |          | 15  | 0.2261            | 0.0036          | 0.0038                | 0.2261            | 0.0036          | 0.0039                | 0.2261            | 0.0036          | 0.0039                |
|               |          | 22  | 0.2256            | 0.0033          | 0.0036                | 0.2256            | 0.0033          | 0.0036                | 0.2256            | 0.0033          | 0.0036                |
| 0             | -0.2344  | 10  | -0.2346           | 0.0038          | 0.0042                | -0.2346           | 0.0039          | 0.0042                | -0.2345           | 0.0039          | 0.0043                |
|               |          | 15  | -0.2346           | 0.0035          | 0.0038                | -0.2346           | 0.0035          | 0.0039                | -0.2346           | 0.0035          | 0.0039                |
|               |          | 22  | -0.2341           | 0.0032          | 0.0036                | -0.2341           | 0.0032          | 0.0036                | -0.2341           | 0.0032          | 0.0036                |

Table B: Simulation results for estimating  $K_{YX}$  with balanced pleiotropy. The means, standard deviations (sd) and SEs (se) from each method are shown for each set-up based on 500 simulated datasets.  $\mu_\alpha$  represents the mean of the pleiotropic/direct effects (with standard deviation  $\sigma_\alpha = 0.1$ ).  $N$  represents the number of top SNPs that are used.

| Balanced pleiotropy |          |     |                   |                 |                       |                   |                 |                       |                   |                 |                       |
|---------------------|----------|-----|-------------------|-----------------|-----------------------|-------------------|-----------------|-----------------------|-------------------|-----------------|-----------------------|
| $\mu_\alpha$        | $K_{YX}$ | $N$ | CD-Ratio          |                 |                       | CD-Egger          |                 |                       | CD-GLS            |                 |                       |
|                     |          |     | Mean( $\hat{K}$ ) | sd( $\hat{K}$ ) | Mean( $se(\hat{K})$ ) | Mean( $\hat{K}$ ) | sd( $\hat{K}$ ) | Mean( $se(\hat{K})$ ) | Mean( $\hat{K}$ ) | sd( $\hat{K}$ ) | Mean( $se(\hat{K})$ ) |
| 0                   | 0        | 10  | 0.0007            | 0.1023          | 0.0053                | -0.0057           | 0.0801          | 0.0741                | -0.0056           | 0.0803          | 0.0741                |
|                     |          | 15  | 0.0013            | 0.0767          | 0.0044                | -0.0017           | 0.0579          | 0.0547                | -0.0017           | 0.0587          | 0.0551                |
|                     |          | 22  | 0.0013            | 0.0563          | 0.0037                | -0.0007           | 0.0431          | 0.041                 | -0.0005           | 0.0436          | 0.0419                |
| 0                   | 0.2257   | 10  | 0.2801            | 0.0615          | 0.0046                | 0.2531            | 0.0586          | 0.0591                | 0.2535            | 0.0587          | 0.059                 |
|                     |          | 15  | 0.2479            | 0.0579          | 0.0041                | 0.2339            | 0.0508          | 0.0503                | 0.2341            | 0.051           | 0.0504                |
|                     |          | 22  | 0.2181            | 0.0531          | 0.0037                | 0.2201            | 0.0397          | 0.0393                | 0.2203            | 0.0402          | 0.0401                |
| 0                   | -0.2344  | 10  | -0.2871           | 0.0636          | 0.0047                | -0.265            | 0.0615          | 0.0628                | -0.2652           | 0.0615          | 0.0627                |
|                     |          | 15  | -0.2545           | 0.0595          | 0.0041                | -0.2454           | 0.0524          | 0.0527                | -0.2455           | 0.0525          | 0.0527                |
|                     |          | 22  | -0.2233           | 0.0545          | 0.0037                | -0.2296           | 0.0409          | 0.0408                | -0.2295           | 0.0414          | 0.0416                |

Table C: Simulation results for estimating  $K_{YX}$  with directional pleiotropy. The means, standard deviations (sd) and SEs (se) from each method are shown for each set-up based on 500 simulated datasets.  $\mu_\alpha$  represents the mean of the pleiotropic/direct effects (with standard deviation  $\sigma_\alpha = 0.1$ ).  $N$  represents the number of top SNPs that are used.

| Directional pleiotropy |          |     |                   |                 |                       |                   |                 |                       |                   |                 |                       |
|------------------------|----------|-----|-------------------|-----------------|-----------------------|-------------------|-----------------|-----------------------|-------------------|-----------------|-----------------------|
| $\mu_\alpha$           | $K_{YX}$ | $N$ | CD-Ratio          |                 |                       | CD-Egger          |                 |                       | CD-GLS            |                 |                       |
|                        |          |     | Mean( $\hat{K}$ ) | sd( $\hat{K}$ ) | Mean( $se(\hat{K})$ ) | Mean( $\hat{K}$ ) | sd( $\hat{K}$ ) | Mean( $se(\hat{K})$ ) | Mean( $\hat{K}$ ) | sd( $\hat{K}$ ) | Mean( $se(\hat{K})$ ) |
| 0.2                    | 0        | 10  | -0.0908           | 0.1345          | 0.0053                | 0.02              | 0.0529          | 0.0618                | 0.02              | 0.0529          | 0.0617                |
|                        |          | 15  | -0.0347           | 0.0843          | 0.0044                | -0.0017           | 0.0428          | 0.0508                | -0.0017           | 0.0428          | 0.0507                |
|                        |          | 22  | -0.0112           | 0.0538          | 0.0039                | -0.0005           | 0.0386          | 0.0368                | -0.0004           | 0.0392          | 0.0375                |
| 0.4                    | 0        | 10  | -0.1389           | 0.1189          | 0.0051                | 0.0297            | 0.041           | 0.086                 | 0.0297            | 0.041           | 0.0859                |
|                        |          | 15  | -0.0857           | 0.0824          | 0.0045                | -0.0029           | 0.0381          | 0.0689                | -0.0029           | 0.0381          | 0.0687                |
|                        |          | 22  | -0.0183           | 0.0448          | 0.0041                | -0.0004           | 0.0306          | 0.0291                | -0.0003           | 0.0311          | 0.0297                |
| 0.6                    | 0        | 10  | -0.2007           | 0.1215          | 0.0052                | 0.0419            | 0.0363          | 0.0991                | 0.0418            | 0.0363          | 0.0989                |
|                        |          | 15  | -0.1052           | 0.0673          | 0.0045                | -0.009            | 0.032           | 0.0783                | -0.009            | 0.032           | 0.0781                |
|                        |          | 22  | -0.0317           | 0.0357          | 0.0042                | -0.0003           | 0.024           | 0.0228                | -0.0002           | 0.0244          | 0.0233                |
| 1                      | 0        | 10  | -0.2569           | 0.1313          | 0.0053                | 0.0553            | 0.0306          | 0.1098                | 0.0551            | 0.0306          | 0.1095                |
|                        |          | 15  | -0.1162           | 0.0461          | 0.0045                | -0.0106           | 0.0234          | 0.0854                | -0.0108           | 0.0234          | 0.085                 |
|                        |          | 22  | -0.0506           | 0.0241          | 0.0043                | -0.0002           | 0.0161          | 0.0153                | -0.0002           | 0.0164          | 0.0156                |
| 0.2                    | 0.2027   | 10  | 0.3346            | 0.1275          | 0.0055                | 0.0563            | 0.0751          | 0.0692                | 0.0563            | 0.075           | 0.0691                |
|                        |          | 15  | 0.2443            | 0.0844          | 0.0045                | 0.1211            | 0.0499          | 0.0519                | 0.1212            | 0.0499          | 0.0518                |
|                        |          | 22  | 0.1898            | 0.0514          | 0.0039                | 0.1987            | 0.0369          | 0.0355                | 0.1989            | 0.0375          | 0.0362                |
| 0.4                    | 0.1614   | 10  | 0.1881            | 0.1075          | 0.005                 | 0.0984            | 0.0587          | 0.0951                | 0.0983            | 0.0587          | 0.095                 |
|                        |          | 15  | 0.1739            | 0.0857          | 0.0045                | 0.0996            | 0.0412          | 0.0698                | 0.0996            | 0.0412          | 0.0696                |
|                        |          | 22  | 0.1438            | 0.0448          | 0.0041                | 0.1593            | 0.0301          | 0.0285                | 0.1595            | 0.0307          | 0.029                 |
| 0.6                    | 0.1272   | 10  | 0.0887            | 0.1052          | 0.005                 | 0.1067            | 0.0511          | 0.1023                | 0.1066            | 0.0512          | 0.102                 |
|                        |          | 15  | 0.0851            | 0.0812          | 0.0044                | 0.0939            | 0.0342          | 0.0788                | 0.0938            | 0.0342          | 0.0786                |
|                        |          | 22  | 0.0944            | 0.0362          | 0.0042                | 0.1261            | 0.024           | 0.0225                | 0.1263            | 0.0244          | 0.023                 |
| 1                      | 0.0856   | 10  | 0.0104            | 0.1078          | 0.0051                | 0.1021            | 0.0307          | 0.1091                | 0.1019            | 0.0307          | 0.1089                |
|                        |          | 15  | -0.0067           | 0.0553          | 0.0044                | 0.0636            | 0.0235          | 0.0869                | 0.0634            | 0.0235          | 0.0865                |
|                        |          | 22  | 0.0313            | 0.0244          | 0.0043                | 0.0851            | 0.0162          | 0.0152                | 0.0852            | 0.0165          | 0.0155                |
| 0.2                    | -0.2093  | 10  | -0.4414           | 0.0938          | 0.0052                | -0.1217           | 0.0642          | 0.0681                | -0.1217           | 0.0642          | 0.0681                |
|                        |          | 15  | -0.3054           | 0.0714          | 0.0046                | -0.1886           | 0.0519          | 0.053                 | -0.1885           | 0.0519          | 0.0528                |
|                        |          | 22  | -0.2172           | 0.0517          | 0.0039                | -0.2061           | 0.037           | 0.0366                | -0.206            | 0.0373          | 0.0373                |
| 0.4                    | -0.1649  | 10  | -0.4235           | 0.0964          | 0.0053                | -0.0929           | 0.046           | 0.0866                | -0.093            | 0.046           | 0.0864                |
|                        |          | 15  | -0.3038           | 0.0687          | 0.0048                | -0.1428           | 0.04            | 0.0679                | -0.1429           | 0.0399          | 0.0676                |
|                        |          | 22  | -0.1796           | 0.0435          | 0.0041                | -0.1636           | 0.0298          | 0.029                 | -0.1635           | 0.03            | 0.0296                |
| 0.6                    | -0.129   | 10  | -0.4022           | 0.0538          | 0.0054                | -0.0712           | 0.0367          | 0.1002                | -0.0714           | 0.0368          | 0.0999                |
|                        |          | 15  | -0.2979           | 0.0778          | 0.0048                | -0.1129           | 0.032           | 0.0771                | -0.113            | 0.032           | 0.0768                |
|                        |          | 22  | -0.1552           | 0.0351          | 0.0042                | -0.1285           | 0.0236          | 0.0228                | -0.1285           | 0.0238          | 0.0233                |
| 1                      | -0.0862  | 10  | -0.4157           | 0.055           | 0.0055                | -0.0247           | 0.0261          | 0.1112                | -0.0248           | 0.0261          | 0.1108                |
|                        |          | 15  | -0.2396           | 0.0762          | 0.0047                | -0.0882           | 0.0252          | 0.0843                | -0.0883           | 0.0252          | 0.0839                |
|                        |          | 22  | -0.1301           | 0.0238          | 0.0043                | -0.0862           | 0.0159          | 0.0153                | -0.0862           | 0.0161          | 0.0156                |

Figure A: Relative frequencies of decisions for causal direction of proposed methods when there is no causal relationship between  $X$  and  $Y$  ( $K_{YX} = 0$ ) and no pleiotropic effects ( $\mu_\alpha = 0, \sigma_\alpha = 0$ ) for different  $N = 10, 15, 22$ .

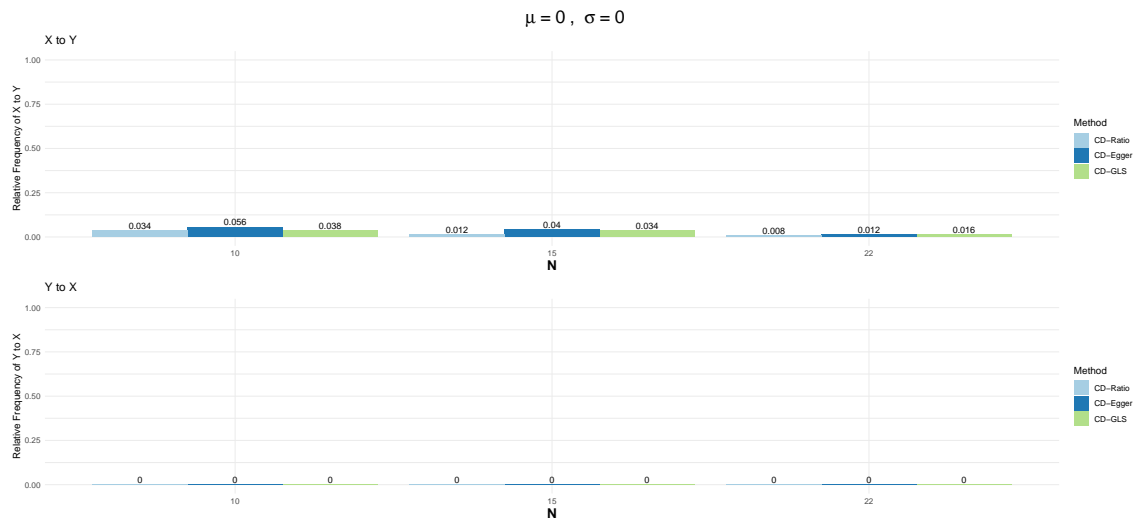

Figure B: Relative frequencies of decisions for causal direction of proposed methods when there is no causal relationship between  $X$  and  $Y$  ( $K_{YX} = 0$ ) and balanced pleiotropic effects ( $\mu_\alpha = 0, \sigma_\alpha = 0.1$ ) for different  $N = 10, 15, 22$ .

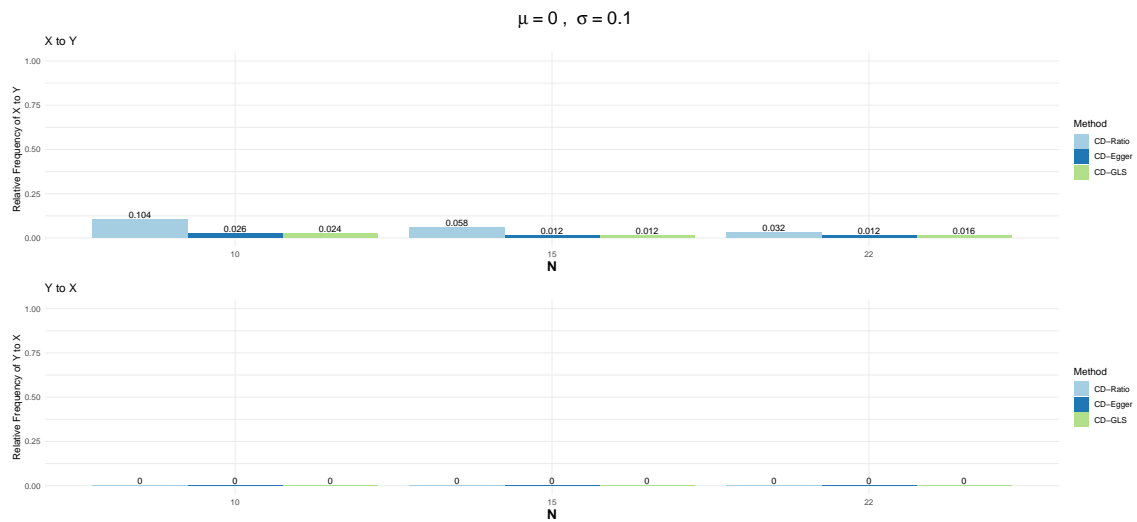

Figure C: Relative frequencies of decisions for causal direction of proposed methods when there is no causal relationship between  $X$  and  $Y$  ( $K_{YX} = 0$ ) and directional pleiotropic effects ( $\mu_\alpha = 0.2, \sigma_\alpha = 0.1$ ) for different  $N = 10, 15, 22$ .

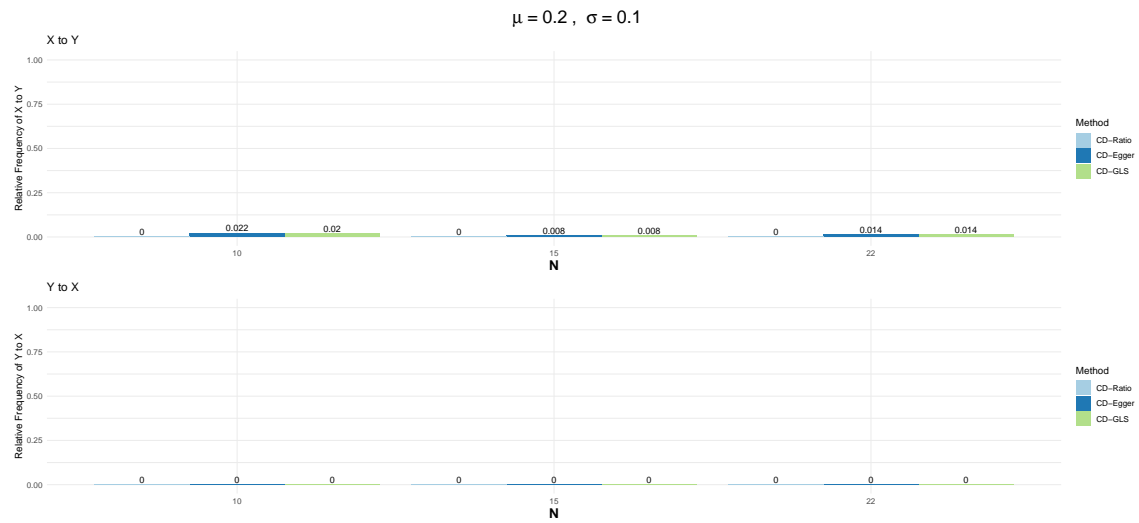

Figure D: Relative frequencies of decisions for causal direction of proposed methods when there is no causal relationship between  $X$  and  $Y$  ( $K_{YX} = 0$ ) and directional pleiotropic effects ( $\mu_\alpha = 0.4, \sigma_\alpha = 0.1$ ) for different  $N = 10, 15, 22$ .

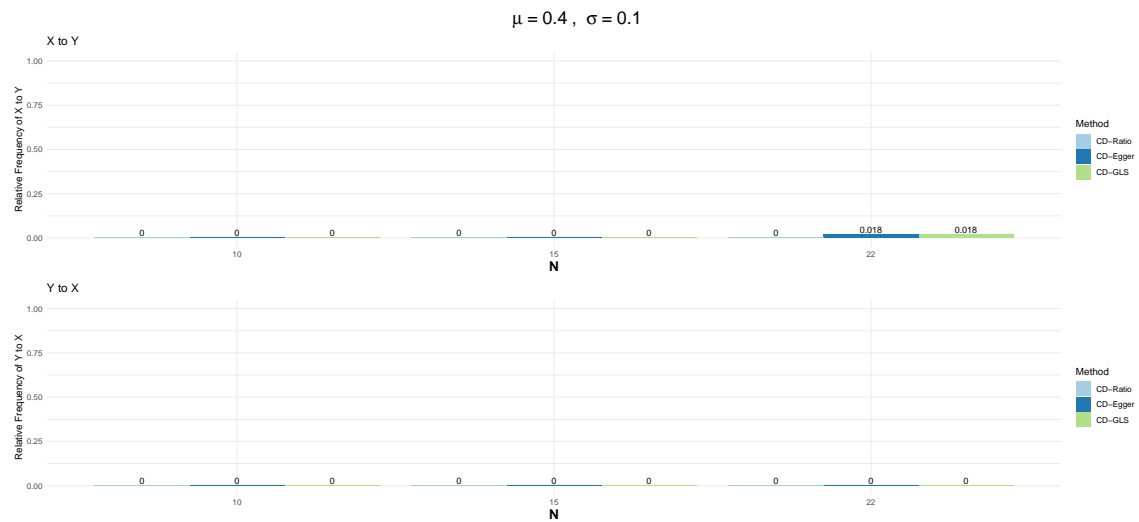

Figure E: Relative frequencies of decisions for causal direction of proposed methods when there is no causal relationship between  $X$  and  $Y$  ( $K_{YX} = 0$ ) and directional pleiotropic effects ( $\mu_\alpha = 0.6, \sigma_\alpha = 0.1$ ) for different  $N = 10, 15, 22$ .

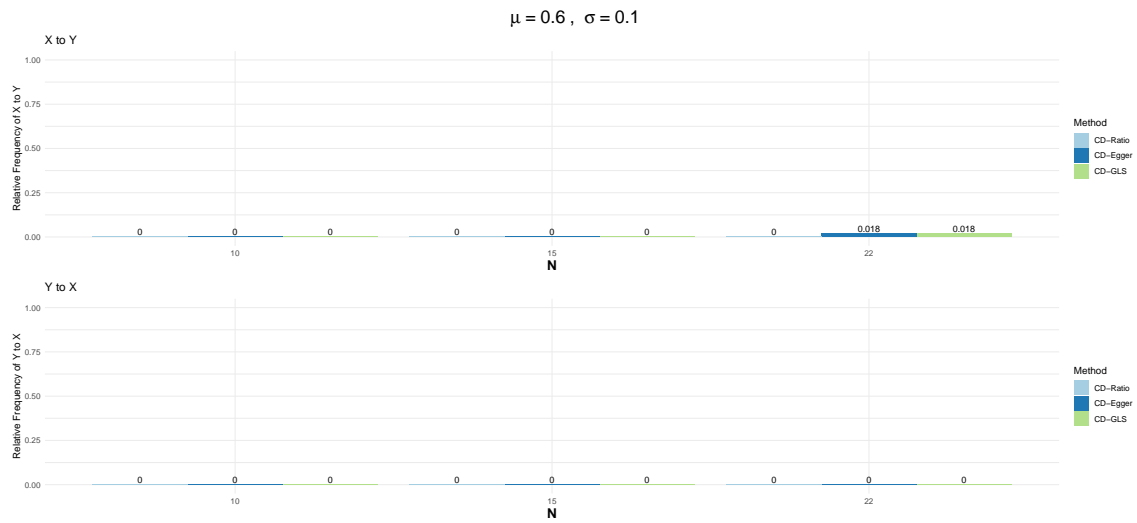

Figure F: Relative frequencies of decisions for causal direction of proposed methods when there is no causal relationship between  $X$  and  $Y$  ( $K_{YX} = 0$ ) and directional pleiotropic effects ( $\mu_\alpha = 1, \sigma_\alpha = 0.1$ ) for different  $N = 10, 15, 22$ .

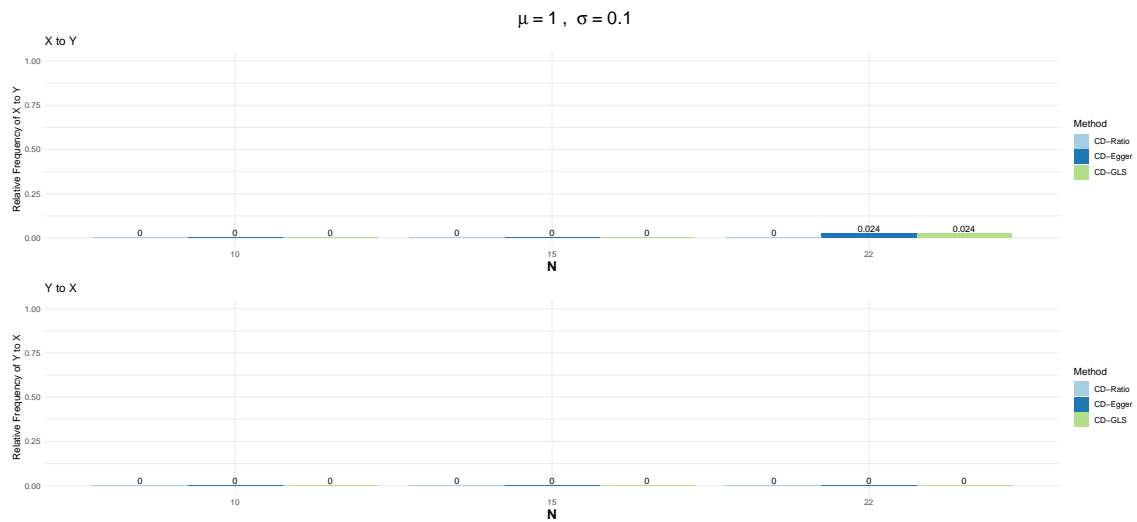

Supplement: pgen.1009105.s009.pdf [file pgen.1009105.s009.pdf]
