# Supplementary material for: Inferring causal direction between two traits in the presence of horizontal pleiotropy with GWAS summary data
Source: PubMed Central journal article supplement (PMC7660933; doi:10.1371/journal.pgen.1009105), 2020-11-02
Supplement: pgen.1009105.s002.pdf [file pgen.1009105.s002.pdf]

## S2 Text: Details of CD-Egger and CD-GLS

### Distribution of $b_{Yg}$

In the main text, when there are direct effects from  $g$ 's to  $Y$ , we got

$$\rho_{Yg} = (\alpha_{Yg} + \beta_{YX} \cdot \beta_{Xg}) \cdot \frac{\sqrt{\text{var}(g)}}{\sqrt{\text{var}(Y)}} = \alpha_{Yg} \cdot \frac{\sqrt{\text{var}(g)}}{\sqrt{\text{var}(Y)}} + K_{YX} \cdot \rho_{Xg} = b_{Yg} + K_{YX} \cdot \rho_{Xg}. \quad (1)$$

Here  $\alpha_{Yg}$ 's are the direct effects of  $g$ 's to  $Y$  in the *marginal model*.  $g$ 's are standardized to have mean 0 and variance 1, and the covariance matrix of  $g$ 's is  $\Sigma$ . If we assume the following joint model:

$$Y = \beta_{Y0} + \beta_{YX} \cdot X + \alpha_{Yg_1}^{(0)} \cdot g_1 + \cdots + \alpha_{Yg_m}^{(0)} \cdot g_m + U + \varepsilon_Y \quad (2)$$

Here  $\alpha_{Yg_i}^{(0)}$ 's are direct effects in the *joint model*, and assume  $\alpha_{Yg_i}^{(0)}$ 's are i.i.d.  $N(b_0, \sigma_0^2)$ . Then

$$\begin{aligned} \rho_{Yg} &= \frac{1}{\sqrt{\text{var}(Y)}} \begin{pmatrix} \text{cov}(Y, g_1) \\ \vdots \\ \text{cov}(Y, g_m) \end{pmatrix} = \frac{1}{\sqrt{\text{var}(Y)}} \left( \beta_{YX} \cdot \begin{pmatrix} \text{cov}(X, g_1) \\ \vdots \\ \text{cov}(X, g_m) \end{pmatrix} + \Sigma \begin{pmatrix} \alpha_{Yg_1}^{(0)} \\ \vdots \\ \alpha_{Yg_m}^{(0)} \end{pmatrix} \right) \\ &= \beta_{YX} \frac{\sqrt{\text{var}(X)}}{\sqrt{\text{var}(Y)}} \begin{pmatrix} \frac{\text{cov}(X, g_1)}{\sqrt{\text{var}(X)}} \\ \vdots \\ \frac{\text{cov}(X, g_m)}{\sqrt{\text{var}(X)}} \end{pmatrix} + \frac{\Sigma}{\sqrt{\text{var}(Y)}} \begin{pmatrix} \alpha_{Yg_1}^{(0)} \\ \vdots \\ \alpha_{Yg_m}^{(0)} \end{pmatrix} \\ &= K_{YX} \cdot \rho_{Xg} + \frac{\Sigma}{\sqrt{\text{var}(Y)}} \begin{pmatrix} \alpha_{Yg_1}^{(0)} \\ \vdots \\ \alpha_{Yg_m}^{(0)} \end{pmatrix} \end{aligned} \quad (3)$$

So we have

$$b_{Yg} = \frac{\Sigma}{\sqrt{\text{var}(Y)}} \begin{pmatrix} \alpha_{Yg_1}^{(0)} \\ \vdots \\ \alpha_{Yg_m}^{(0)} \end{pmatrix} \sim N \left( \frac{b_0 \cdot \Sigma \mathbf{1}}{\sqrt{\text{var}(Y)}}, \frac{\sigma_0^2 \Sigma^2}{\text{var}(Y)} \right) \quad (4)$$

### CD-Egger: Estimation of $(b_0, K_{YX})$ and $\sigma_0^2$

For CD-Egger, we have:

$$\mathbf{r}_{Yg} = b_0 \cdot \mathbf{v} + K_{YX} \cdot \mathbf{r}_{Xg} + \boldsymbol{\varepsilon}, \boldsymbol{\varepsilon} \sim N \left( 0, \frac{\mathbf{V}_{Yg}}{n_Y} + \sigma_0^2 \Sigma^2 = \mathbf{V}_{YX} \right) \quad (5)$$

We use an iterative algorithm to estimate  $(b_0, K_{YX})$  and  $\sigma_0^2$ . Set initial  $\sigma_0^2 = 0$ .

Step (1): Given  $\sigma_0^2$ , we can get  $\mathbf{V}_{YX} = \frac{\mathbf{V}_{Yg}}{n_Y} + \sigma_0^2 \Sigma^2$ . Then estimating  $(b_0, K_{YX})$  is a Generalized Least Square problem with design matrix  $\mathbf{X}$  and covariance matrix of errors  $\boldsymbol{\Omega}$ :

$$\begin{aligned} \mathbf{X} &= (\mathbf{v} \quad \mathbf{r}_{Xg}) = \begin{pmatrix} v_1 & r_{Xg_1} \\ \vdots & \vdots \\ v_m & r_{Xg_m} \end{pmatrix} \\ \boldsymbol{\Omega} &= \mathbf{V}_{YX} \end{aligned} \quad (6)$$

So we can get the estimation  $(\hat{b}_0, \hat{K}_{YX})$  and their covariance matrix:

$$\begin{aligned} \begin{pmatrix} \hat{b}_0 \\ \hat{K}_{YX} \end{pmatrix} &= (\mathbf{X}^T \boldsymbol{\Omega}^{-1} \mathbf{X})^{-1} \mathbf{X}^T \boldsymbol{\Omega}^{-1} \mathbf{r}_{Yg} \\ \text{cov} \begin{pmatrix} \hat{b}_0 \\ \hat{K}_{YX} \end{pmatrix} &= (\mathbf{X}^T \boldsymbol{\Omega}^{-1} \mathbf{X})^{-1} \end{aligned} \quad (7)$$

Step (2): Given  $(\hat{b}_0, \hat{K}_{YX})$ , plug them in equation (5), denoting

$$\mathbf{x}_{YX} = \mathbf{r}_{Yg} - \hat{b}_0 \cdot \mathbf{v} - \hat{K}_{YX} \cdot \mathbf{r}_{Xg} \quad (8)$$

We get

$$\boldsymbol{\Sigma}^{-1} \mathbf{x}_{YX} \sim N(0, \frac{\boldsymbol{\Sigma}^{-1} \mathbf{V}_{Yg} \boldsymbol{\Sigma}^{-1}}{n_Y} + \sigma_0^2 \mathbf{I}) \quad (9)$$

Do the eigenvalue decomposition of

$$\frac{\boldsymbol{\Sigma}^{-1} \mathbf{V}_{Yg} \boldsymbol{\Sigma}^{-1}}{n_Y} = \mathbf{Q}^T \begin{pmatrix} \lambda_1 & \dots & 0 \\ \vdots & \ddots & \vdots \\ 0 & \dots & \lambda_m \end{pmatrix} \mathbf{Q} \quad (10)$$

Here  $\mathbf{Q}$  is orthonormal,  $\lambda_1, \dots, \lambda_m$  are eigen-values. Denote  $\mathbf{Q} \boldsymbol{\Sigma}^{-1} \mathbf{x}_{YX} = \mathbf{x}$ , we get:

$$\mathbf{x} \sim N(0, \begin{pmatrix} \lambda_1 + \sigma_0^2 & \dots & 0 \\ \vdots & \ddots & \vdots \\ 0 & \dots & \lambda_m + \sigma_0^2 \end{pmatrix}) \quad (11)$$

Then the log-likelihood function

$$l = -\frac{1}{2} \left( \frac{x_1^2}{\lambda_1 + \sigma_0^2} + \dots + \frac{x_m^2}{\lambda_m + \sigma_0^2} \right) - \frac{1}{2} (\ln(\lambda_1 + \sigma_0^2) + \dots + \ln(\lambda_m + \sigma_0^2)) + \text{Constant} \quad (12)$$

To get the MLE of  $\sigma_0^2$ , it is equivalent to get root of

$$\frac{x_1^2}{(\lambda_1 + \sigma_0^2)^2} + \dots + \frac{x_m^2}{(\lambda_m + \sigma_0^2)^2} = \frac{1}{\lambda_1 + \sigma_0^2} + \dots + \frac{1}{\lambda_m + \sigma_0^2} \quad (13)$$

We can use the bisection method to search root for (13) and get the root, i.e., MLE of  $\sigma_0^2$ , denoted as  $\hat{\sigma}_0^2$ .

Step (3): Update  $\mathbf{V}_{YX}$  with  $\hat{\sigma}_0^2$ , then repeat Step (1) and Step (2) iteratively until convergence, to get the final estimations  $(\hat{b}_0, \hat{K}_{YX})$  and  $\hat{\sigma}_0^2$ . And we can get  $se(\hat{b}_0)$  and  $se(\hat{K}_{YX})$  from (7).

### CD-GLS: Derivation and Estimation of $(b_0, K_{YX})$ and $\sigma_0^2$

In **CD-Egger** a possible downside is we ignore the variability in  $\mathbf{r}_{Xg}$  while account for that of  $\mathbf{r}_{Yg}$ . We propose following method **Causal Direction-GLS**, and **CD-GLS** for short, to take into consider of both variation in  $\mathbf{r}_{Xg}$  and  $\mathbf{r}_{Yg}$ .

Denote  $\mathbf{b}_{Yg}^* = \mathbf{b}_{Yg} - b_0 \cdot \mathbf{v}$ , so  $\mathbf{b}_{Yg}^* \sim N(0, \sigma_0^2 \boldsymbol{\Sigma}^2)$ . Then  $\frac{\rho_{Yg} - b_0 \cdot \mathbf{v}}{\rho_{Xg}} = K_{YX} + \frac{\mathbf{b}_{Yg}^*}{\rho_{Xg}}$ , using Delta Method we will have:

$$\frac{\mathbf{r}_{Yg} - b_0 \cdot \mathbf{v}}{\mathbf{r}_{Xg}} \mid \rho_{Yg}, \rho_{Xg} \sim N \left( \left( \begin{array}{c} \frac{\rho_{Yg_1} - b_0 \cdot v_1}{\rho_{Xg_1}} \\ \vdots \\ \frac{\rho_{Yg_m} - b_0 \cdot v_m}{\rho_{Xg_m}} \end{array} \right), \mathbf{J}_g^T \cdot \left( \begin{array}{cc} \frac{\mathbf{V}_{Yg}}{n_Y} & \mathbf{0}_{m \times m} \\ \mathbf{0}_{m \times m} & \frac{\mathbf{V}_{Xg}}{n_X} \end{array} \right) \cdot \mathbf{J}_g \right) := N(\mathbf{1} \cdot K_{YX} + \frac{\mathbf{b}_{Yg}^*}{\rho_{Xg}}, \mathbf{V}_{YXg}), \quad (14)$$

Here

$$\mathbf{J}_g = \begin{pmatrix} \frac{1}{r_{Xg_1}} & \dots & 0 & -\frac{r_{Yg_1} - b_0 \cdot v_1}{r_{Xg_1}^2} & \dots & 0 \\ \vdots & \ddots & \vdots & \vdots & \ddots & \vdots \\ 0 & \dots & \frac{1}{r_{Xg_m}} & 0 & \dots & -\frac{r_{Yg_m} - b_0 \cdot v_m}{r_{Xg_m}^2} \end{pmatrix} \quad (15)$$

So we have:

$$\frac{\mathbf{r}_{Yg} - b_0 \cdot \mathbf{v}}{\mathbf{r}_{Xg}} = \begin{pmatrix} \frac{r_{Yg_1} - b_0 \cdot v_1}{r_{Xg_1}} \\ \vdots \\ \frac{r_{Yg_m} - b_0 \cdot v_m}{r_{Xg_m}} \end{pmatrix} \sim N(\mathbf{1} \cdot K_{YX}, \mathbf{V}_{YXg} + \sigma_0^2 \mathbf{P}) = N(\mathbf{1} \cdot K_{YX}, \mathbf{V}_{YX}) \quad (16)$$

Here

$$\mathbf{P} = \begin{pmatrix} \frac{1}{r_{Xg_1}} & & \\ & \ddots & \\ & & \frac{1}{r_{Xg_m}} \end{pmatrix} \boldsymbol{\Sigma}^2 \begin{pmatrix} \frac{1}{r_{Xg_1}} & & \\ & \ddots & \\ & & \frac{1}{r_{Xg_m}} \end{pmatrix} \quad (17)$$

Again, similar to CD-Egger, we can use iterative method to estimate  $(b_0, K_{YX})$  and  $\sigma_0^2$ , and get standard errors of the estimations  $se(\hat{b}_0), se(\hat{K}_{YX})$ . Equation (16) is equivalent to

$$\frac{\mathbf{r}_{Yg}}{\mathbf{r}_{Xg}} = b_0 \cdot \frac{\mathbf{v}}{\mathbf{r}_{Xg}} + K_{YX} \cdot \mathbf{1} + \boldsymbol{\varepsilon}, \boldsymbol{\varepsilon} \sim N(0, \mathbf{V}_{YXg} + \sigma_0^2 \mathbf{P}) \quad (18)$$

Set initial  $b_0 = 0, \sigma_0^2 = 0$ .

Step (1): Given  $b_0, \sigma_0^2$ , we can get  $\mathbf{V}_{YX} = \mathbf{V}_{YXg} + \sigma_0^2 \mathbf{P}$ . Then estimating  $(b_0, K_{YX})$  is a Generalize Least Square problem with design matrix  $\mathbf{X}$  and covariance matrix of errors  $\boldsymbol{\Omega}$ :

$$\mathbf{X} = \begin{pmatrix} \frac{\mathbf{v}}{\mathbf{r}_{Xg}} & \mathbf{1} \end{pmatrix} = \begin{pmatrix} \frac{v_1}{r_{Xg_1}} & 1 \\ \vdots & \vdots \\ \frac{v_m}{r_{Xg_m}} & 1 \end{pmatrix} \quad (19)$$

$$\boldsymbol{\Omega} = \mathbf{V}_{YX}$$

So we can get the estimation  $(\hat{b}_0, \hat{K}_{YX})$  and their covariance matrix:

$$\begin{pmatrix} \hat{b}_0 \\ \hat{K}_{YX} \end{pmatrix} = (\mathbf{X}^T \boldsymbol{\Omega}^{-1} \mathbf{X})^{-1} \mathbf{X}^T \boldsymbol{\Omega}^{-1} \frac{\mathbf{r}_{Yg}}{\mathbf{r}_{Xg}} \quad (20)$$

$$cov \begin{pmatrix} \hat{b}_0 \\ \hat{K}_{YX} \end{pmatrix} = (\mathbf{X}^T \boldsymbol{\Omega}^{-1} \mathbf{X})^{-1}$$

Step (2): Given  $(\hat{b}_0, \hat{K}_{YX})$ , plug them in equation (18), denoting

$$\begin{aligned} \mathbf{x}_{YX} &= \frac{\mathbf{r}_{Yg}}{\mathbf{r}_{Xg}} - \hat{b}_0 \cdot \frac{\mathbf{v}}{\mathbf{r}_{Xg}} - \hat{K}_{YX} \cdot \mathbf{1} \\ \mathbf{U} &= \begin{pmatrix} r_{Xg_1} & & \\ & \ddots & \\ & & r_{Xg_m} \end{pmatrix} \end{aligned} \quad (21)$$

We get

$$\boldsymbol{\Sigma}^{-1} \mathbf{U} \mathbf{x}_{YX} \sim N(0, \boldsymbol{\Sigma}^{-1} \mathbf{U} \mathbf{V}_{YXg} \mathbf{U} \boldsymbol{\Sigma}^{-1} + \sigma_0^2 \mathbf{I}) \quad (22)$$

Do the eigenvalue decomposition of

$$\boldsymbol{\Sigma}^{-1} \mathbf{U} \mathbf{V}_{YXg} \mathbf{U} \boldsymbol{\Sigma}^{-1} = \mathbf{Q}^T \begin{pmatrix} \lambda_1 & \dots & 0 \\ \vdots & \ddots & \vdots \\ 0 & \dots & \lambda_m \end{pmatrix} \mathbf{Q} \quad (23)$$

Here  $\mathbf{Q}$  is orthonormal,  $\lambda_1, \dots, \lambda_m$  are eigen-values. Denote  $\mathbf{Q} \boldsymbol{\Sigma}^{-1} \mathbf{U} \mathbf{x}_{YX} = \mathbf{x}$ , we get:

$$\mathbf{x} \sim N\left(0, \begin{pmatrix} \lambda_1 + \sigma_0^2 & \dots & 0 \\ \vdots & \ddots & \vdots \\ 0 & \dots & \lambda_m + \sigma_0^2 \end{pmatrix}\right) \quad (24)$$

Then the log-likelihood function

$$l = -\frac{1}{2} \left( \frac{x_1^2}{\lambda_1 + \sigma_0^2} + \dots + \frac{x_m^2}{\lambda_m + \sigma_0^2} \right) - \frac{1}{2} (\ln(\lambda_1 + \sigma_0^2) + \dots + \ln(\lambda_m + \sigma_0^2)) + \text{Constant} \quad (25)$$

To get the MLE of  $\sigma_0^2$ , it is equivalent to get root of

$$\frac{x_1^2}{(\lambda_1 + \sigma_0^2)^2} + \dots + \frac{x_m^2}{(\lambda_m + \sigma_0^2)^2} = \frac{1}{\lambda_1 + \sigma_0^2} + \dots + \frac{1}{\lambda_m + \sigma_0^2} \quad (26)$$

We can use the bisection method to search root for (26) and get the root, i.e., MLE of  $\sigma_0^2$ , denoted as  $\hat{\sigma}_0^2$ .

Step (3): Update  $\mathbf{V}_{YX}$  with  $\hat{b}_0$  and  $\hat{\sigma}_0^2$ , then repeat Step (1) and Step (2) iteratively until convergence, to get the final estimations  $(\hat{b}_0, \hat{K}_{YX})$  and  $\hat{\sigma}_0^2$ . And we can get  $se(\hat{b}_0)$  and  $se(\hat{K}_{YX})$  from (20).
