# Supplementary material for: Inferring causal direction between two traits in the presence of horizontal pleiotropy with GWAS summary data
Source: PubMed Central journal article supplement (PMC7660933; doi:10.1371/journal.pgen.1009105), 2020-11-02
Supplement: pgen.1009105.s003.pdf [file pgen.1009105.s003.pdf]

### S3 Text: Degrees of Freedom for the Goodness-of-Fit Tests

#### CD-Ratio

For **CD-Ratio**, from the main text we have:

$$\begin{pmatrix} \mathbf{r}_{Yg} \\ \mathbf{r}_{Xg} \end{pmatrix} \sim N(\mathbf{1} \cdot K_{YX}, \mathbf{V}_{YXg}) \quad (1)$$

And

$$\hat{K}_{YX} = \frac{\mathbf{1}^T \cdot \mathbf{V}_{YXg}^{-1} \cdot \begin{pmatrix} \mathbf{r}_{Yg} \\ \mathbf{r}_{Xg} \end{pmatrix}}{\mathbf{1}^T \cdot \mathbf{V}_{YXg}^{-1} \cdot \mathbf{1}} \quad (2)$$

For simplicity, we use  $\mathbf{r}$  to represent  $\begin{pmatrix} \mathbf{r}_{Yg} \\ \mathbf{r}_{Xg} \end{pmatrix}$ ,  $K$  to represent  $K_{YX}$ ,  $\hat{K}$  to represent  $\hat{K}_{YX}$ , and  $\mathbf{V}$  to represent  $\mathbf{V}_{YXg}$ . Then the test statistic  $Q_{Ratio}$  is:

$$Q_{Ratio} = (\mathbf{r} - \mathbf{1} \cdot \hat{K})^T \mathbf{V}^{-1} (\mathbf{r} - \mathbf{1} \cdot \hat{K}) \quad (3)$$

And we have

$$\mathbf{r} - \mathbf{1} \cdot \hat{K} = \left( \mathbf{I} - \frac{\mathbf{1}\mathbf{1}^T \mathbf{V}^{-1}}{\mathbf{1}^T \mathbf{V}^{-1} \mathbf{1}} \right) \mathbf{r} \quad (4)$$

So

$$\mathbf{V}^{-\frac{1}{2}} (\mathbf{r} - \mathbf{1} \cdot \hat{K}) = \mathbf{V}^{-\frac{1}{2}} \left( \mathbf{I} - \frac{\mathbf{1}\mathbf{1}^T \mathbf{V}^{-1}}{\mathbf{1}^T \mathbf{V}^{-1} \mathbf{1}} \right) \mathbf{r} \sim N(\boldsymbol{\mu}, \mathbf{A}) \quad (5)$$

Here

$$\boldsymbol{\mu} = \mathbf{V}^{-\frac{1}{2}} \left( \mathbf{I} - \frac{\mathbf{1}\mathbf{1}^T \mathbf{V}^{-1}}{\mathbf{1}^T \mathbf{V}^{-1} \mathbf{1}} \right) \mathbf{1} \cdot K = \mathbf{0} \quad (6)$$

And

$$\begin{aligned} \mathbf{A} &= \mathbf{V}^{-\frac{1}{2}} \left( \mathbf{I} - \frac{\mathbf{1}\mathbf{1}^T \mathbf{V}^{-1}}{\mathbf{1}^T \mathbf{V}^{-1} \mathbf{1}} \right) \mathbf{V} \left( \mathbf{I} - \frac{\mathbf{V}^{-1} \mathbf{1}\mathbf{1}^T}{\mathbf{1}^T \mathbf{V}^{-1} \mathbf{1}} \right) \mathbf{V}^{-\frac{1}{2}} \\ &= \mathbf{I} - \frac{\mathbf{V}^{-\frac{1}{2}} \mathbf{1}\mathbf{1}^T \mathbf{V}^{-\frac{1}{2}}}{\mathbf{1}^T \mathbf{V}^{-1} \mathbf{1}} \end{aligned} \quad (7)$$

Since  $\frac{\mathbf{V}^{-\frac{1}{2}} \mathbf{1}\mathbf{1}^T \mathbf{V}^{-\frac{1}{2}}}{\mathbf{1}^T \mathbf{V}^{-1} \mathbf{1}}$  is the projection matrix to vector  $\mathbf{V}^{-\frac{1}{2}} \mathbf{1}$ , eigenvalues of  $\mathbf{A}$  are  $(m-1)$  1's and one 0, leading to  $Q_{Ratio} \sim \chi_{m-1}^2$ .

#### CD-Egger

For **CD-Egger**, from the main text we have:

$$\mathbf{r}_{Yg} = b_0 \cdot \mathbf{v} + K_{YX} \cdot \mathbf{r}_{Xg} + \boldsymbol{\varepsilon}, \boldsymbol{\varepsilon} \sim N\left(0, \frac{\mathbf{V}_{Yg}}{n_Y} + \sigma_0^2 \boldsymbol{\Sigma}^2 = \mathbf{V}_{YX}\right) \quad (8)$$

As we show in the Section 3 above, plug in estimation  $\hat{\sigma}_0^2$  of  $\sigma_0^2$  we get  $\mathbf{V}_{YX}$ , with notations in equation (6) of S2 Text, we have

$$\begin{pmatrix} \hat{b}_0 \\ \hat{K}_{YX} \end{pmatrix} = (\mathbf{X}^T \boldsymbol{\Omega}^{-1} \mathbf{X})^{-1} \mathbf{X}^T \boldsymbol{\Omega}^{-1} \mathbf{r}_{Yg} \quad (9)$$

And the test statistic  $Q_{Egger}$  is:

$$Q_{Egger} = (\mathbf{r}_{Yg} - \hat{b}_0 \cdot \mathbf{v} - \hat{K}_{YX} \cdot \mathbf{r}_{Xg})^T \mathbf{V}_{YX}^{-1} (\mathbf{r}_{Yg} - \hat{b}_0 \cdot \mathbf{v} - \hat{K}_{YX} \cdot \mathbf{r}_{Xg}) \quad (10)$$

Here

$$\begin{aligned}
& \mathbf{r}_{Yg} - \hat{b}_0 \cdot \mathbf{v} - \hat{K}_{YX} \cdot \mathbf{r}_{Xg} \\
&= \left( \mathbf{I} - \mathbf{X}(\mathbf{X}^T \boldsymbol{\Omega}^{-1} \mathbf{X})^{-1} \mathbf{X}^T \boldsymbol{\Omega}^{-1} \right) \mathbf{r}_{Yg} \\
&= \left( \mathbf{I} - \mathbf{X}(\mathbf{X}^T \boldsymbol{\Omega}^{-1} \mathbf{X})^{-1} \mathbf{X}^T \boldsymbol{\Omega}^{-1} \right) \boldsymbol{\varepsilon}
\end{aligned} \tag{11}$$

So

$$\begin{aligned}
& \mathbf{V}_{YX}^{-\frac{1}{2}} (\mathbf{r}_{Yg} - \hat{b}_0 \cdot \mathbf{v} - \hat{K}_{YX} \cdot \mathbf{r}_{Xg}) \\
&= \mathbf{V}_{YX}^{-\frac{1}{2}} \left( \mathbf{I} - \mathbf{X}(\mathbf{X}^T \boldsymbol{\Omega}^{-1} \mathbf{X})^{-1} \mathbf{X}^T \boldsymbol{\Omega}^{-1} \right) \boldsymbol{\varepsilon} \sim N(\mathbf{0}, \mathbf{A})
\end{aligned} \tag{12}$$

Here

$$\begin{aligned}
\mathbf{A} &= \mathbf{V}_{YX}^{-\frac{1}{2}} \left( \mathbf{I} - \mathbf{X}(\mathbf{X}^T \boldsymbol{\Omega}^{-1} \mathbf{X})^{-1} \mathbf{X}^T \boldsymbol{\Omega}^{-1} \right) \mathbf{V}_{YX} \left( \mathbf{I} - \boldsymbol{\Omega}^{-1} \mathbf{X}(\mathbf{X}^T \boldsymbol{\Omega}^{-1} \mathbf{X})^{-1} \mathbf{X}^T \right) \mathbf{V}_{YX}^{-\frac{1}{2}} \\
&= \mathbf{I} - \boldsymbol{\Omega}^{-\frac{1}{2}} \mathbf{X}(\mathbf{X}^T \boldsymbol{\Omega}^{-1} \mathbf{X})^{-1} \mathbf{X}^T \boldsymbol{\Omega}^{-\frac{1}{2}}
\end{aligned} \tag{13}$$

Since  $\boldsymbol{\Omega}^{-\frac{1}{2}} \mathbf{X}(\mathbf{X}^T \boldsymbol{\Omega}^{-1} \mathbf{X})^{-1} \mathbf{X}^T \boldsymbol{\Omega}^{-\frac{1}{2}}$  is the projection matrix to dimension-2 space  $\boldsymbol{\Omega}^{-\frac{1}{2}} \mathbf{X}$ , eigenvalues of  $\mathbf{A}$  are  $(m-2)$  2's and two 0's, leading to  $Q_{Egger} \sim \chi_{m-2}^2$ .

### CD-GLS

Based on the asymptotic distribution from above equation (16) in S2 Text, for CD-GLS we can construct GOF test:

$$Q_{GLS} = \left( \frac{\mathbf{r}_{Yg} - \hat{b}_0 \cdot \mathbf{v}}{\mathbf{r}_{Xg}} - \mathbf{1} \cdot \hat{K}_{YX} \right)^T \mathbf{V}_{YX}^{-1} \left( \frac{\mathbf{r}_{Yg} - \hat{b}_0 \cdot \mathbf{v}}{\mathbf{r}_{Xg}} - \mathbf{1} \cdot \hat{K}_{YX} \right) \tag{14}$$

Similar to CD-Egger, the (asymptotic) null distribution is  $Q_{GLS} \sim \chi_{m-2}^2$ .
