# Supplementary material for: Inferring causal direction between two traits in the presence of horizontal pleiotropy with GWAS summary data
Source: PubMed Central journal article supplement (PMC7660933; doi:10.1371/journal.pgen.1009105), 2020-11-02
Supplement: pgen.1009105.s007.pdf [file pgen.1009105.s007.pdf]

## S7 Text: Simulations for Bi-directional Causal Effects

We set the sample size  $n = 10000$ , generated  $g_1$  and  $g_2$  independently with a minor allele frequency of 0.3. We generated the independent error terms  $\varepsilon_1$  and  $\varepsilon_2$  from a normal distribution with mean 0 and variance 3.2, and generated the confounder  $U$  from a normal distribution with mean 0 and variance 0.8. We set  $\gamma_1 = 1$ ,  $\gamma_2 = 1$ ,  $\beta_{XU} = 1$ , and  $\beta_{YU} = 1$ . With different  $\beta_1$  and  $\beta_2$ , we generated two independent samples of  $X$  and  $Y$  from the reduced form of the models (25) in the main text, using the first sample to get summary statistics for  $X$  and the second for  $Y$ , and applied **CD-Ratio** to both directions, leading to out **bi-CD-Ratio**. For comparison, we also applied **MR-Steiger** and **MR-Wald-Ratio** to both directions. When considering the candidate direction of  $X$  to  $Y$ , we used  $g_1$  as the IV; for  $Y$  to  $X$ , we used  $g_2$  as the IV. For each setup we did simulations 1000 times, and drew conclusions on both directions based on the 95% confidence intervals. Table A shows the simulation results of estimating  $K_1$ ,  $K_2$  and their standard errors with bi-CD-Ratio, and Table B compares \*(bi-directional) CD-Ratio, MR-Steiger, and MR-Wald-Ratio for their relative frequencies of concluding with any causal directions.

Table A: Simulation results for bi-CD-Ratio with different pairs of  $\beta_1$  and  $\beta_2$ . For both directions we show the true value of  $K$ , the mean and standard deviation of estimates, and mean of standard errors.

| No causal effect                             |                   |                     |                   |                         |                   |                     |                   |                         |
|----------------------------------------------|-------------------|---------------------|-------------------|-------------------------|-------------------|---------------------|-------------------|-------------------------|
| $(\beta_1, \beta_2)$                         | $X \rightarrow Y$ |                     |                   |                         | $Y \rightarrow X$ |                     |                   |                         |
|                                              | $K_1$             | Mean( $\hat{K}_1$ ) | sd( $\hat{K}_1$ ) | Mean( $se(\hat{K}_1)$ ) | $K_2$             | Mean( $\hat{K}_2$ ) | sd( $\hat{K}_2$ ) | Mean( $se(\hat{K}_2)$ ) |
| (0,0)                                        | 0                 | 0.001               | 0.032             | 0.033                   | 0                 | 0.001               | 0.032             | 0.032                   |
| Unidirectional causal effect from $X$ to $Y$ |                   |                     |                   |                         |                   |                     |                   |                         |
| $(\beta_1, \beta_2)$                         | $X \rightarrow Y$ |                     |                   |                         | $Y \rightarrow X$ |                     |                   |                         |
|                                              | $K_1$             | Mean( $\hat{K}_1$ ) | sd( $\hat{K}_1$ ) | Mean( $se(\hat{K}_1)$ ) | $K_2$             | Mean( $\hat{K}_2$ ) | sd( $\hat{K}_2$ ) | Mean( $se(\hat{K}_2)$ ) |
| (-0.2,0)                                     | -0.203            | -0.203              | 0.032             | 0.033                   | 0                 | 0.001               | 0.032             | 0.032                   |
| (0.2,0)                                      | 0.19              | 0.191               | 0.032             | 0.033                   | 0                 | 0.001               | 0.034             | 0.034                   |
| Unidirectional causal effect from $Y$ to $X$ |                   |                     |                   |                         |                   |                     |                   |                         |
| $(\beta_1, \beta_2)$                         | $X \rightarrow Y$ |                     |                   |                         | $Y \rightarrow X$ |                     |                   |                         |
|                                              | $K_1$             | Mean( $\hat{K}_1$ ) | sd( $\hat{K}_1$ ) | Mean( $se(\hat{K}_1)$ ) | $K_2$             | Mean( $\hat{K}_2$ ) | sd( $\hat{K}_2$ ) | Mean( $se(\hat{K}_2)$ ) |
| (0,-0.2)                                     | 0                 | 0.001               | 0.031             | 0.032                   | -0.203            | -0.203              | 0.033             | 0.033                   |
| (0,0.2)                                      | 0                 | 0.001               | 0.034             | 0.034                   | 0.19              | 0.191               | 0.032             | 0.033                   |
| Bi-directional causal effect                 |                   |                     |                   |                         |                   |                     |                   |                         |
| $(\beta_1, \beta_2)$                         | $X \rightarrow Y$ |                     |                   |                         | $Y \rightarrow X$ |                     |                   |                         |
|                                              | $K_1$             | Mean( $\hat{K}_1$ ) | sd( $\hat{K}_1$ ) | Mean( $se(\hat{K}_1)$ ) | $K_2$             | Mean( $\hat{K}_2$ ) | sd( $\hat{K}_2$ ) | Mean( $se(\hat{K}_2)$ ) |
| (-0.2,-0.2)                                  | -0.2              | -0.199              | 0.031             | 0.032                   | -0.2              | -0.199              | 0.032             | 0.032                   |
| (-0.2,0.2)                                   | -0.214            | -0.214              | 0.034             | 0.035                   | 0.187             | 0.188               | 0.032             | 0.032                   |
| (0.2, -0.2)                                  | 0.187             | 0.188               | 0.032             | 0.032                   | -0.214            | -0.214              | 0.035             | 0.035                   |
| (0.2, 0.2)                                   | 0.2               | 0.202               | 0.034             | 0.035                   | 0.2               | 0.201               | 0.034             | 0.035                   |

Table B: Comparison of (bi-directional) CD-Ratio, MR-Steiger and MR-Wald-Ratio for the relative frequencies of their conclusions on the causal directions.

| No causal effect                         |                   |            |               |                   |            |               |
|------------------------------------------|-------------------|------------|---------------|-------------------|------------|---------------|
| $(\beta_1, \beta_2)$                     | $X \rightarrow Y$ |            |               | $Y \rightarrow X$ |            |               |
|                                          | CD-Ratio          | MR-Steiger | MR-Wald-Ratio | CD-Ratio          | MR-Steiger | MR-Wald-Ratio |
| (0,0)                                    | 0.035             | 1          | 0.035         | 0.047             | 1          | 0.047         |
| Unidirectional causal effect from X to Y |                   |            |               |                   |            |               |
| $(\beta_1, \beta_2)$                     | $X \rightarrow Y$ |            |               | $Y \rightarrow X$ |            |               |
|                                          | CD-Ratio          | MR-Steiger | MR-Wald-Ratio | CD-Ratio          | MR-Steiger | MR-Wald-Ratio |
| (-0.2,0)                                 | 1                 | 1          | 1             | 0.047             | 1          | 0.047         |
| (0.2,0)                                  | 1                 | 1          | 1             | 0.047             | 1          | 0.047         |
| Unidirectional causal effect from Y to X |                   |            |               |                   |            |               |
| $(\beta_1, \beta_2)$                     | $X \rightarrow Y$ |            |               | $Y \rightarrow X$ |            |               |
|                                          | CD-Ratio          | MR-Steiger | MR-Wald-Ratio | CD-Ratio          | MR-Steiger | MR-Wald-Ratio |
| (0,-0.2)                                 | 0.035             | 1          | 0.035         | 1                 | 1          | 1             |
| (0,0.2)                                  | 0.035             | 1          | 0.035         | 0.999             | 1          | 0.999         |
| Bi-directional causal effect             |                   |            |               |                   |            |               |
| $(\beta_1, \beta_2)$                     | $X \rightarrow Y$ |            |               | $Y \rightarrow X$ |            |               |
|                                          | CD-Ratio          | MR-Steiger | MR-Wald-Ratio | CD-Ratio          | MR-Steiger | MR-Wald-Ratio |
| (-0.2,-0.2)                              | 1                 | 1          | 1             | 1                 | 1          | 1             |
| (-0.2,0.2)                               | 1                 | 1          | 1             | 0.999             | 1          | 0.999         |
| (0.2,-0.2)                               | 1                 | 1          | 1             | 1                 | 1          | 1             |
| (0.2,0.2)                                | 1                 | 1          | 1             | 0.999             | 1          | 0.999         |

From Table A, we can see that for all situations, our proposed bi-CD-Ratio could estimate the true  $K_1$  and  $K_2$  pretty well, and the means of  $se(\hat{K}_1)$  and  $se(\hat{K}_2)$  were close to  $sd(\hat{K}_1)$  and  $sd(\hat{K}_2)$ . From Table B, when there was no causal relationship, both the bi-CD-Ratio and MR-Wald-Ratio could control the Type-I Errors around 0.05; when there was a causal direction, both methods could always detect it with a relative frequency of 1. MR-Steiger always concluded with the bi-directional causal effect due to the following reason: for  $X$  to  $Y$  we used  $g_1$  as the valid instrument;  $g_1$  always had a larger correlation with  $X$  than that with  $Y$  no matter whether  $X$  had a causal effect on  $Y$  or not; hence Steger's method would always conclude with a causal direction from  $X$  to  $Y$ .; similarly, when considering  $Y$  to  $X$  with  $g_2$  as the instrument, it would always conclude with a causal direction of  $Y$  to  $X$ . and same for  $Y$  to  $X$ . In contrast, based on correlation ratios, (bi-directional) CD-Ratio could determine the existence of a causal effect correctly by comparing the ratio with 0; on the other hand, MR-Steiger, based on differences of correlations, could not correctly determine the existence of a causal relationship under this situation.
